1 **Protein Interactomes Identify Distinct Pathways for *Streptococcus mutans* YidC1 and**  
2 **YidC2 Membrane Protein Insertases**

3  
4 **Patricia Lara Vasquez\*, Surabhi Mishra\*, Senthil K. Kuppaswamy, Paula J. Crowley,**  
5 **L. Jeannine Brady<sup>1</sup>**

6  
7 **\*equal contribution**

8  
9 Department of Oral Biology, University of Florida, Gainesville, Florida, 32610, USA.

10  
11 **Running title: Defining *S. mutans* YidC1 and YidC2 interactomes**

12  
13 <sup>1</sup>Corresponding author: L. Jeannine Brady, Department of Oral Biology, University of Florida,

14 P.O. Box 100424, Gainesville, Florida 32610

15 Email: [jbrady@dental.ufl.edu](mailto:jbrady@dental.ufl.edu)

16 Phone: +1 352.273.8839

17 Fax: +1 352.273.8840

18

19

20  
21  
22  
23  
24  
25  
26  
27  
28  
29  
30  
31  
32  
33  
34  
35  
36  
37  
38  
39  
40  
41  
42

## Abstract

Virulence properties of cariogenic *Streptococcus mutans* depend on integral membrane proteins. Bacterial protein trafficking involves the co-translational signal recognition particle (SRP) pathway components Ffh and FtsY, the SecY translocon, and membrane-localized YidC chaperone/insertases. Unlike *Escherichia coli*, *S. mutans* survives loss of the SRP pathway. In addition, *S. mutans* has two *yidC* paralogs. The  $\Delta yidC2$  phenotype largely parallels that of  $\Delta ffh$  and  $\Delta ftsY$  while the  $\Delta yidC1$  phenotype is less severe. This study defined YidC1 and YidC2 interactomes to identify their respective functions alone and in concert with the SRP, ribosome, and/or Sec translocon. A chemical cross-linking approach was employed, whereby whole cell lysates were treated with formaldehyde followed by Western blotting using anti-Ffh, FtsY, YidC1 or YidC2 antibodies and mass spectrometry (MS) analysis of gel-shifted bands. Cross-linked lysates from WT and  $\Delta yidC2$  strains were also reacted with anti-YidC2 antibodies coupled to magnetic Dynabeads<sup>TM</sup>, with co-captured proteins identified by MS. Additionally, C-terminal tails of YidC1 and YidC2 were engineered as glutathione-S-transferase fusion proteins and subjected to 2D Difference Gel Electrophoresis and MS analysis after being reacted with non-cross-linked lysates. Results indicate that YidC2 works in concert with the SRP-pathway, while YidC1 works in concert with the SecY translocon independently of the SRP. In addition, YidC1 and/or YidC2 can act alone in the insertion of a limited number of small integral membrane proteins. The YidC2-SRP and YidC1/SecY pathways appear to function as part of an integrated machinery that couples translation and transport with cell division, as well as transcription and DNA replication.

43  
44  
45  
46  
47  
48  
49  
50  
51  
52  
53  
54  
55  
56  
57  
58

## Importance

*Streptococcus mutans* is a prevalent oral pathogen and causative agent of tooth decay. Many proteins that enable this bacterium to thrive in its environmental niche, and cause disease, are embedded in its cytoplasmic membrane. The machinery that transports proteins into bacterial membranes differs between Gram-negative and Gram-positive organisms. One important difference is the presence of multiple YidC paralogs in Gram-positive bacteria. Characterization of a protein's interactome can help define its physiological role. Herein, we characterized the interactomes of *S. mutans* YidC1 and YidC2. Results indicate that YidC1 and YidC2 have individualized functions in separate membrane insertion pathways, and suggest putative substrates of the respective pathways. Furthermore, *S. mutans* membrane transport proteins appear as part of a larger network of proteins involved in replication, transcription, translation, and cell division/cell shape. This information contributes to our understanding of protein transport in Gram-positive bacteria in general, and informs our understanding of *S. mutans* pathogenesis.

59

## Introduction

60 Dental caries, is the most common infectious disease in the world [1]. Tooth decay  
61 occurs when acidogenic bacteria on the tooth surface take up and ferment dietary sugars,  
62 producing organic acids that cause enamel demineralization. A major agent of caries,  
63 *Streptococcus mutans*, is acidogenic and aciduric enabling this species to tolerate acid end  
64 products and outcompete other oral microbiota. *S. mutans* displays inherent characteristics that  
65 promote dominance in its ecological niche, including efficient carbohydrate uptake and  
66 fermentation, sucrose-dependent and sucrose-independent adhesins leading to biofilm formation,  
67 robust acid tolerance mechanisms, and quorum-sensing systems involved in bacteriocin  
68 production and genetic competence [2]. These processes depend on integral membrane proteins,  
69 and/or membrane-associated proteins. *S. mutans*' competitive advantage and virulence attributes  
70 stem from its ability to sense and adapt to the harsh conditions it faces in the oral cavity.  
71 Efficient protein transport into and through the membrane is an essential aspect of this  
72 adaptability.

73 In bacteria, many integral membrane proteins are inserted into the cytoplasmic membrane  
74 co-translationally using the Signal Recognition Particle (SRP) pathway conserved in all living  
75 cells [reviewed in [3]]. The SRP binds hydrophobic signal sequences of nascent polypeptide  
76 substrates as they emerge from the ribosome. The bacterial ribosome-nascent-chain (RNC)  
77 complex is targeted to the membrane via a transient interaction of the SRP protein Ffh with the  
78 bacterial SRP receptor, FtsY. This docks the RNC with the SecYEG translocon pore, and  
79 enables translocation of the substrate into the membrane concomitant with translation. In  
80 addition to SecYEG, the integral membrane protein YidC also participates in membrane protein  
81 integration [4]. YidC belongs to the Oxa/Alb/YidC family of insertases found in mitochondria,

82 chloroplasts, and bacteria. Membrane biogenesis has been most widely studied in the Gram-  
83 negative bacterium *Escherichia coli*; however, studies in Gram-positive bacteria such as *S.*  
84 *mutans* and *Bacillus spp.* have revealed differences in the translocation machineries of Gram-  
85 negative and Gram-positive organisms [5]. Importantly Gram-positive bacteria almost  
86 universally encode two, or occasionally more, YidC paralogs. Gram-negative organisms possess  
87 a single YidC.

88         The SRP pathway is dispensable in *S. mutans*, although its disruption results in growth  
89 impairment, environmental stress-sensitivity, and diminished genetic competence [6] [7].  
90 Deletion of *S. mutans yidC2* causes a similar phenotype, whereas deletion of *yidC1* appears less  
91 detrimental [7-10]. YidC is essential in *E. coli* [11]. *S. mutans* survives elimination of *yidC1* or  
92 *yidC2*, but a double mutant is not viable. Nor is a double *yidC2/ffh* deletion mutant. In contrast,  
93 an *ffh/yidC1* mutant is viable, albeit severely stress sensitive and growth impaired [10]. These  
94 results suggest synthetic lethality and functional redundancies between the SRP pathway and  
95 YidC2, and between YidC1 and YidC2. While YidC1 and YidC2 apparently substitute for one  
96 another in some cases, distinct functional activities have been identified. YidC1 impacts cell  
97 surface biogenesis and bacterial adhesion more than YidC2, while YidC2 impacts cell wall  
98 biosynthesis and localization of penicillin binding proteins to the division septum [9, 10]. YidC1  
99 and YidC2 demonstrate 27% amino acid homology and 48% similarity, each having six  
100 predicted transmembrane (TM) domains in the preprotein, and five in the mature insertase (TM2-  
101 TM6). The cytoplasmic C-terminal tail of YidC2 is longer and more highly charged than  
102 YidC1's, and appending the YidC2 tail onto YidC1 enables the chimeric protein to partially  
103 complement  $\Delta yidC2$  stress sensitivity [8]. Furthermore, gain of YidC2-like function point  
104 mutations have been reported within TM2 of *S. mutans* YidC1 [10], as well as within TM2 of

105 SpoIIIJ, the YidC1 homolog of *Bacillus subtilis* [12]. Thus, while there is functional overlap  
106 between Gram-positive dual YidCs, paralog-specific features are recognized. It is of interest,  
107 therefore, to compare *S. mutans* YidC1 and YidC2-related interactomes to define respective roles  
108 of each paralog in the physiology of this pathogen, and understand the reason for dual YidCs in  
109 Gram-positive bacteria in general.

110 *E.coli* YidC can work independently [11, 13, 14], in collaboration with the Sec  
111 machinery [15-17], and in collaboration with SRP pathway components [17, 18]. *E.coli*  
112 membrane proteins inserted by YidC alone are relatively few, and generally contain only one or  
113 two TM domains [19-24]. Insertion of larger membrane proteins requires the Sec machinery and  
114 YidC [18, 25]. Respective substrates of integrated YidC/SecYEG and YidC/SecYEG/SRP  
115 pathways are largely unknown. Comparison of the membrane proteomes of *S. mutans* wildtype  
116 and mutant strains lacking *ffh*, *yidC1*, *yidC2*, or *ffh/yidC1* suggested that its SRP pathway works  
117 in concert with YidC1 or YidC2 specifically, or with no preference, to insert most membrane-  
118 localized substrates [10]. In a few instances only the SRP pathway, or only YidC1 or YidC2,  
119 appeared to be required [10]. Past studies of Gram-positive YidCs have used genetic approaches  
120 comparing phenotypic differences between wild-type and mutant strains [7, 8, 12], or cross-  
121 complementation in heterologous systems [26-28]. Solved crystal structures of bacterial YidCs  
122 [29-35] have also facilitated investigations of insertase interactions with other protein transport  
123 machinery components [17, 36-40]. Such studies employed *in vitro* or highly defined systems  
124 and provided information regarding particular protein-protein combinations. In contrast, in the  
125 current study we utilized an unbiased screening approach to evaluate similarities and differences  
126 between protein interactomes of *S. mutans* YidC1 and YidC2 within whole cell lysates. This led  
127 to identification of potential common, as well as YidC1- or YidC2-specific, substrates, identified

128 interaction networks including proteins associated with translation as well as transcription and  
129 DNA replication, and revealed that YidC2 operates in concert with the SRP pathway while  
130 YidC1 operates in concert with the Sec machinery independently of SRP.

## 131 **Results and Discussion**

132 **Identification of potential binding partners of *S. mutans* YidC1, YidC2, Ffh, and/or FtsY in**  
133 **whole cell lysates by formaldehyde cross-linking and Western blot gel shift.** As a first step  
134 toward identifying putative binding partners and/or substrates of YidC1, YidC2, or the SRP  
135 pathway we utilized the cell penetrating cross-linking agent, formaldehyde. After cross-linking,  
136 whole cell lysates were prepared, separated by SDS-PAGE and potential regions of interest were  
137 identified by Western blot with anti-YidC1, YidC2, Ffh, and FtsY-specific antibodies (Fig. 1A).  
138 Bands corresponding to YidC1, YidC2, Ffh, and FtsY were readily identified in both cross-  
139 linked and non-cross-linked samples. Western blotting also revealed several regions of gel-  
140 shifted antibody reactivity in the formaldehyde cross-linked sample compared to the non-cross-  
141 linked sample (Fig.1A). Three distinct gel-shifted regions were excised from corresponding  
142 Coomassie Blue-stained SDS-polyacrylamide gels for mass-spectrometric (MS) analysis (Fig.  
143 1B). These included a high molecular weight region (~ 200-250 kDa) reactive with anti-YidC2,  
144 Ffh, and FtsY, but not anti-YidC1 antibodies, a middle region of ~40-45 kDa reactive with anti-  
145 YidC1 and anti-YidC2 antibodies, and a lower region of ~30-33 kDa reactive only with anti-  
146 YidC1 antibody (Fig. 1A). Proteins present in the upper, middle and lower MW gel slices of the  
147 cross-linked sample, but not the non-cross-linked sample, are summarized in Table S1. Initially,  
148 MS analysis was performed only on the upper and middle molecular weight regions, but because  
149 relatively few proteins were identified in that experiment, we moved on to the immunocapture  
150 approach described below to improve sensitivity. During that time period a more sensitive mass

151 spectrometer became available and the experiment was repeated with analysis of all three  
152 molecular weight regions. The results presented represent the combined data from both  
153 experiments.

154 A total of 65, 38, and 119 proteins were identified in the upper, middle, and lower  
155 molecular weight gel slices, respectively, of the cross-linked but not non-cross-linked sample  
156 (Table S1). The lower region, recognized by anti-YidC1 antibodies, contained the highest  
157 proportion of membrane proteins (31/119). These may therefore represent substrates of a  
158 pathway that involves YidC1, but not YidC2. In contrast, the higher region recognized by anti-  
159 Ffh, anti-FtsY, and anti YidC2 antibodies, and the middle region recognized by anti-YidC1 and  
160 anti-YidC2 antibodies, contained fewer membrane proteins, 9/65 and 5/38, respectively. Most  
161 of the other non-integral membrane proteins identified in all three regions had previously been  
162 found to be membrane-associated in our proteomic analysis of membrane preparations derived  
163 from protoplasts of *S. mutans* wild-type compared to  $\Delta yidC1$ ,  $\Delta yidC2$ ,  $\Delta ffh$ , and  $\Delta ffh/yidC1$   
164 mutants [10]. Many membrane-associated proteins are components of multimeric membrane-  
165 localized complexes that also contain integral membrane components. Thus, identification of  
166 membrane-associated proteins may indirectly reflect the actual integral membrane substrates.  
167 We also identified multiple proteins involved in DNA replication and repair, transcription,  
168 translation, and cell division suggesting an extensive coordinated cellular machinery that  
169 includes membrane protein translocation (Table 1).

170 That the upper gel-shifted region was recognized by anti-FtsY, anti-Ffh and anti-YidC2,  
171 but not anti-YidC1, antibodies, suggests that YidC2, but not YidC1, likely works in concert with  
172 the SRP pathway. The middle and lower regions were recognized by both anti-YidC1 and anti-  
173 YidC2 antibodies, or only by anti-YidC1 antibody, respectively, but not by anti-Ffh or anti-FtsY



174 antibodies. This result suggests that the SRP pathway does not normally interact with YidC1.  
175 Because *S. mutans* survives deletion of *yidC2*, but not of *yidC1* and *yidC2* [7], YidC1 may  
176 cooperate with the SRP pathway only when YidC2 is absent. Our previous membrane proteomic  
177 analysis of *S. mutans* protein transport mutants suggested that the SRP pathway acts in concert  
178 with at least one YidC paralog in the insertion of multiple substrates [10]. However, that study  
179 utilized deletion mutants while the current study is more indicative of protein interactions in the  
180 wild-type strain. The identification of SecY and YajC, as well as YidC1, in the lower region  
181 suggests that these represent components of a pathway that operates independently of YidC2  
182 and/or the SRP, and supports previous reports of a SecY-YidC interaction in *E. coli* that is  
183 modulated by YajC [15, 17, 36, 41]. Thus in *S. mutans*, YidC1 likely serves as the major  
184 interaction partner of SecY/YajC. It has also been reported in *E. coli* that SecYEG and YidC  
185 compete for binding to the SRP receptor, FtsY [17]. Our results suggest, therefore, that YidC1  
186 and YidC2 participate in two distinct pathways such that YidC1 functions in concert with the  
187 SecY translocon independently of the SRP pathway, while YidC2 functions primarily in concert  
188 with the SRP pathway. It is interesting that the membrane-associated SecA molecular motor of  
189 the general secretion pathway [42, 43] was identified in the upper region recognized by anti-Ffh,  
190 anti-FtsY, and anti YidC2 antibodies, but not in the lower region that contained SecY and was  
191 recognized by anti-YidC1 antibodies. One reason for detection of SecA in a section of the gel  
192 reactive with anti-SRP antibodies may be through indirect bridging via ribosomal proteins. SecA  
193 and the SRP have been shown to bind to the same location on the *E. coli* ribosome in order to  
194 sort cellular proteins into distinct pathways for secretion through or insertion into the membrane  
195 at the site of translation [44]. Our experiment utilized whole cell lysates and was therefore  
196 biased towards identification of cytoplasmic or membrane proteins and not expected to identify

197 secreted SecA substrates, although SecA itself would be in proximity of SRP components on the  
198 ribosome. Also of interest, the middle region reactive with both anti-YidC1 and anti-YidC2  
199 antibodies, did not include SecY, YajC, or SRP components. *E. coli* YidC is known to function  
200 in a YidC only pathway in the insertion of small membrane proteins [13, 22, 45]. Interestingly, 4  
201 out of the 5 membrane proteins with only 1 or 2 TM domains were present in the middle region  
202 (Table 1). This suggests that YidC1 and/or YidC2 can work independently of SecY, and the  
203 SRP pathway, in the insertion of a limited number of small membrane proteins.

204 In an attempt to identify respective substrates of YidC1-SecY, YidC1/2, or SRP-YidC2  
205 mediated pathways, those proteins predicted to have one or more transmembrane were  
206 categorized according to their presence in upper, middle, or lower regions of the gel (Table 1).  
207 The identification of a higher proportion of membrane proteins in the lower region suggests that  
208 YidC1-SecY/YajC is a widely used pathway for membrane protein insertion. That is, YidC1  
209 likely represents the “housekeeping” paralog in *S. mutans*. A closer examination of membrane  
210 proteins in the lower region revealed known or putative metal transporters including  
211 SMU\_770C, SMU\_998, and a putative zinc ABC transporter ATP-binding protein (SMU\_1994)  
212 suggesting that these particular metal transporters utilize the YidC1-SecY/YajC pathway for  
213 insertion. Also, proteins encoded in an operon of unknown function that includes SMU\_832,  
214 SMU\_833, and SMU\_834 were identified in the lower region. Proteins in the upper region,  
215 suggestive of insertion by a coordinated SRP-YidC2 pathway, included multiple sugar  
216 transporters and several ABC transporters including the competence-associated protein ComA.  
217 *S. mutans* deletion mutants lacking *ffh* or *yidC2* exhibit impaired genetic competence, but this  
218 property is less impacted by elimination of *yidC1* [46]. We did not observe a preference for  
219 single TM compared to multi-pass membrane proteins for the YidC1-SecY/YajC or the SRP-

220 YidC2 pathways. In contrast, as stated above, membrane proteins from the middle region that  
221 may represent substrates of a YidC1 and/or YidC2 only pathway were mostly single or double-  
222 pass membrane proteins except for hemolysin (SMU\_1693), which contains 4 predicted TM  
223 domains.

224         While *in vivo* whole cell cross-linking identified a relatively low number of potential  
225 membrane-localized substrates of the putative SRP-YidC2 mediated protein translocation  
226 pathway, a high proportion of proteins (30/65) present in the upper region of the gel are involved  
227 in DNA replication/repair, transcription, translation, and cell division/cell shape (Table 1).  
228 These results support the idea that the SRP-YidC2 co-translational translocation pathway  
229 operates in the context of a larger consortium of proteins that make up an integrated higher order  
230 machinery, which couples replication, transcription, and cell division with membrane insertion of  
231 a subset of membrane proteins. In contrast, approximately 25% of proteins present in the lower  
232 gel slice representative of the putative SecY-YajC /YidC1 pathway are membrane proteins.  
233 Additionally, multiple proteins identified in this region are associated with replication,  
234 transcription, or translocation. The streptococcal homolog of the ribosome-associated chaperone  
235 trigger factor, RopA, was identified in both the upper and lower regions that likely represent the  
236 SRP-YidC2 and SecY-YidC1-mediated protein translocation pathways, respectively. Trigger  
237 factor has been reported to bind to the same ribosomal protein at the peptide exit site as the SRP  
238 pathway [47, 48]; therefore, the finding of RopA and Ffh in the same gel slice was not  
239 unexpected.

240         Because a whole cell cross-linking approach is limited by the accessibility of exposed  
241 functional groups in the target proteins to formaldehyde [49], the actual integral membrane  
242 substrates of the insertion machinery were likely underrepresented in our dataset due largely to

243 their being buried within the membrane and inaccessible to the cross-linking reagent.

244 Surprisingly YidC1, YidC2, Ffh, and FtsY themselves were also not identified in either cross-

245 linked or non-cross-linked samples, although they were clearly present as evidenced by their

246 detection by Western blot and migration at the correct molecular weight. It is possible that they

247 were not amenable to or present in sufficient quantity for detection by mass-spectrometry.

248 Western blot with high quality antibodies can be more sensitive than standard bottom-up MS in

249 the detection of certain proteins of low abundance [50]. To overcome this potential limitation,

250 we also employed immunocapture experiments in an attempt to improve sensitivity.

251 **Dynabead™ immunocapture of protein complexes from *S. mutans* lysates using anti-YidC2**

252 **antibodies.** To identify potential binding partners of YidC2 and to characterize this insertase's

253 interactome, an immunocapture approach was undertaken in which anti-YidC2 antibodies were

254 covalently coupled to magnetic Dynabeads™. The polyclonal rabbit antibodies used were made

255 against synthetic peptides corresponding to the YidC2 C-terminal tail and cytoplasmic loop

256 between TM2 and TM3. Whole cell lysates from untreated and formaldehyde-treated cells of *S.*

257 *mutans* strain NG8, and its corresponding  $\Delta yidC2$  mutant, were reacted with the antibody-

258 coupled beads and bound proteins were eluted with glycine-HCl, pH 2.0. Aliquots of each

259 sample were analyzed by Western blot (Fig. 2A). As expected, a 27 kDa YidC2 band was

260 identified in the wild-type (WT), but not  $\Delta yidC2$  strain (Fig. 2B). An additional band reactive

261 with anti-YidC2 antibodies was also observed in the cross-linked sample from the WT, but not

262 samples from the mutant strain, or the non-cross-linked control sample from the WT strain.

263 Other higher molecular weight bands were observed in a replicate negative control blot probed

264 only with goat-anti-rabbit heavy chain specific secondary antibodies. These represent anti-

265 YidC2 antibodies present in the eluate that leached from the coupled Dynabeads™ (Fig. 2C).

266 Gel slices corresponding to the ~45 kDa region of interest identified by Western blot were cut  
267 from SDS-PAGE gels of all four samples and analyzed by MS. A total of 269 proteins were  
268 identified in the WT cross-linked sample, 229 in the WT non-cross-linked sample, 246 proteins  
269 in the  $\Delta yidC2$  cross-linked sample, and 284 proteins in the  $\Delta yidC2$  non-cross-linked sample.  
270 Sixty-eight proteins were present in the WT cross-linked sample and 31 in the non-cross-linked  
271 sample that were absent from the corresponding  $\Delta yidC2$  samples (summarized in Table S2). Six  
272 of those were shared between cross-linked and non-cross-linked samples. The presence of such  
273 shared proteins may represent direct binding partners of YidC2 that do not need to be cross-  
274 linked to be co-captured with it. A graphical representation of the types of proteins co-captured  
275 with YidC2 is shown (Fig. 2D).

276         Twenty-four of the 99 total immunocaptured proteins identified in WT but not  $\Delta yidC2$   
277 samples are predicted to have one or more TM domains, with the rest having been identified as  
278 membrane-associated in our previous membrane proteomic analyses [10] (Table S2). Potential  
279 integral membrane substrates of YidC2 identified by this immunocapture experiment include two  
280 subunits of the PTS mannose transporter, metalloprotease (RseP), histidine kinases, enzymes,  
281 and cell wall/cell division related proteins (Table 2). In agreement with our prior gel shift  
282 experiment and analysis of the upper gel slice, we identified SecA as well as other proteins  
283 involved in DNA replication/repair, transcription, translation, and cell division/cell shape in  
284 associated with YidC2 (Fig. 2D, Panel D). Again this suggests that translocation is part of a  
285 coordinated machinery that incorporates additional processes beyond protein translation. In  
286 contrast to the gel shift assay, in which both YajC and SecY were detected in the lower gel slice  
287 reactive with anti-YidC1 antibodies, in the current immunocapture experiment YajC, but not  
288 SecY, was identified as part of YidC2 interactome. Certain differences in the apparent YidC2

289 interactome identified following Western blot gel shift, as opposed to Dynabead<sup>TM</sup>  
290 immunocapture, may relate to those domains of YidC2 available for binding to substrates or  
291 other proteins during the two experimental approaches. Antibodies against cytoplasmic loop 1  
292 and the YidC2 tail domain were utilized for Dynabead<sup>TM</sup> capture of YidC2 and associated  
293 proteins. Thus binding of proteins that interact specifically with either of these regions may have  
294 prevented efficient capture of YidC2 by the antibody-coupled magnetic beads. That is, the  
295 immunocapture dataset was likely biased against proteins that react with cytoplasmic loop 1 or  
296 the YidC2 C-terminal tail. In *E. coli*, cytoplasmic loop 1 of YidC has been reported to interact  
297 with SecY in an *in vivo* photo-crosslinking assay [17]. Thus, occupancy of the corresponding  
298 loop in YidC2 by SecY could potentially have blocked reactivity with the anti-YidC2 loop  
299 antibody and explain why YajC, but not SecY, was identified in the immunocapture assay.  
300 Unlike the Western blot gel shift results, we did not identify Ffh or FtsY in association with  
301 YidC2 in the immunocapture experiment. If the cooperative activity of YidC2 with the SRP  
302 pathway depends on an interaction mediated by its C-terminal tail, that could preclude its  
303 efficient capture by anti-tail-specific antibodies. Previous domain swapping experiments support  
304 this conjecture in that stress tolerance was complemented in a  $\Delta yidC2$  background with chimeric  
305 YidC1 whose C-terminal tail was replaced with that of YidC2 [8]. Collectively, our anti-YidC2  
306 immunocapture assay identified not only the translocation machinery components SecA and  
307 YajC, but also ribosomal proteins, chaperones and proteases, enzymes involved in DNA  
308 replication and repair, and proteins responsible for cell wall generation and cell division.  
309 Because of issues with low coupling efficiency of the anti-YidC2 antibodies to Dynabeads<sup>TM</sup> and  
310 the problem with antibody leaching, this approach was not attempted with anti-YidC1 antibodies.

311 **Difference gel electrophoresis of *S. mutans* proteins captured by YidC1 or YidC2 C-**  
312 **terminal tails.** As an alternative to immobilization of anti-YidC antibodies to Dynabeads™, we  
313 also utilized a Glutathione-S-transferase (GST)-tagged based pull-down approach. While it is  
314 difficult to express *S. mutans yidC1* and *yidC2* in *E. coli* to sufficient levels for large scale  
315 protein purification, both the YidC1 and YidC2 C-terminal tails are soluble, and easily tagged  
316 and purified. We constructed fusion proteins of the YidC1 and YidC2 C-terminal domains with  
317 GST and affinity purified the recombinant polypeptides on Glutathione Sepharose™ (Fig. S1).  
318 Because domain swapping experiments have demonstrated that the positively-charged tails of *S.*  
319 *mutans* YidC1 and YidC2 contribute to certain functional attributes of each paralog [8], we  
320 expected a subset of YidC1 and YidC2 binding partners to interact with these domains. After  
321 purification, the GST-tagged YidC1/2-tail fusion proteins were reacted with *S. mutans* whole cell  
322 lysates (non-cross-linked) and captured on immobilized glutathione using GST as a negative  
323 control. Following elution with reduced glutathione the three samples were individually labeled  
324 with a different CyDye fluorescent dye and subjected to 2D-difference gel electrophoresis  
325 (DIGE) (Fig. 3). One hundred and twenty-one spots were identified as being captured by GST-  
326 YidC1CT and/or GST-YidC2CT, but not by GST (Fig. S2). A complete list of all proteins  
327 identified in each of the gel spots is shown in Table S3. A summary of the proteins pulled down  
328 with GST-Yid1CT (green spots), GST-YidC2CT (red spots), or both (yellow spots) is shown in  
329 Table S4. Seventy-four proteins were co-captured with GST-YidC1CT, and 37 with GST-  
330 YidC2CT (Table S3). Of those, 42 were uniquely co-captured with GST-YidC1CT, while only 5  
331 were uniquely co-captured with GST-YidC2CT (Table S4).

332 The types of proteins co-captured with GST-YidC1CT compared to GST-YidC2CT are  
333 summarized in Table 3. Proteins with 1 or more transmembrane domains were considered as

334 putative substrates. Eleven different integral membrane proteins were found as part of the  
335 YidC1-tail interactome, including 5 that were also pulled down with GST-YidC2CT. Most of  
336 these were transporters with the exception of the cell division protein FtsH, and a histidine kinase  
337 (SMU\_486). All non-integral membrane proteins identified by DIGE (~85%) had previously  
338 been identified as membrane-associated during proteomic analysis of *S. mutans* protoplast-  
339 derived membrane preparations [10]. The predominance of non-integral membrane proteins in  
340 the DIGE dataset suggest that the YidC1 and YidC2 C-terminal tails do not play a prominent role  
341 in recognizing and binding substrates. Twenty of the 24 membrane-associated proteins from the  
342 YidC2-tail interactome were also co-captured with GST-YidC1CT. Interestingly, the SRP  
343 component protein Ffh was found in association with the YidC2-tail, but not with the YidC1-tail.  
344 This supports data from the *in vivo* cross-linking experiments that suggested a cooperative SRP-  
345 YidC2 pathway, and explains why appending the YidC2 tail onto YidC1 enables the chimeric  
346 protein to ameliorate the  $\Delta yidC2$  phenotype. Presumably this manipulation allows the YidC1  
347 insertase to interact with Ffh and function in concert with the SRP pathway machinery. None of  
348 the components of the SecYEG translocon, nor YajC, were identified in association with either  
349 of the C-terminal tails, thus these domains likely do not contribute to YidC1 or YidC2  
350 interactions with the translocon itself.

351 As described above in the gel shift and YidC2 immunocapture experiments, numerous  
352 ribosomal proteins, as well as other components of the translation machinery, were captured in  
353 association with YidC1 and/or YidC2. Such proteins were found irrespective of whether Ffh and  
354 FtsY were also present, suggesting that either *S. mutans* YidC paralog can act to support co-  
355 translational protein translocation in the absence of the SRP pathway. Indeed, YidC2 was  
356 previously demonstrated to complement Oxa1 deficiency in yeast mitochondria that lack an SRP



357 pathway [27]. While YidC1 was present in yeast cell extracts, this paralog was not properly  
358 imported into the mitochondria and therefore could not be assessed in complementation  
359 experiments[27]. When overexpressed in *E.coli*, both YidC1 and YidC2 of *S. mutans* were  
360 found to interact with translating and non-translating ribosomes by a tail-dependent mechanism  
361 [51]. In the current study, the large ribosomal subunit protein, L2, was the most abundant  
362 ribosomal protein pulled down by both the GST-YidC1CT and GST-YidC2CT fusion  
363 polypeptides. In *E. coli*, L2 not only acts as a structural component of the ribosome, it is also  
364 processed to a truncated derivative (tL2) that can interact with the RNA polymerase alpha  
365 subunit and modulate transcription [52]. *E. coli* L2 has also been reported to interact with the  
366 Hsp90 homolog HtpG to modulate its ATPase activity, and also to bind to other chaperones  
367 including DnaK/DnaJ/GrpE and GroEL/GroES [53]. Full-length and truncated *E. coli* L2 also  
368 interact with DnaA to modulate DNA replication [54]. DNA encoding *S. mutans* L2 and rL2  
369 was cloned and the recombinant his-tagged proteins were tested by ELISA to determine whether  
370 either form interacts directly with the C-terminal tails of YidC1 or YidC2. Neither L2 nor rL2  
371 demonstrated significant binding to GST-YidC1CT or to GST-YidC2CT (Fig. S3). Likewise,  
372 SecA, which had been observed in conjunction with YidC2 in both Western blot gel-shift and  
373 immunocapture experiments, did not react directly with GST-YidC2CT (or GST-YidC1CT) (Fig.  
374 S3). This suggests that the association of SecA with YidC2 is indirect, or not mediated by the  
375 YidC2 tail.

376         Similar to the previous experiments, GST-YidC1CT and GST-YidC2CT also captured a  
377 variety of proteins including chaperones and those involved in replication, transcription,  
378 translation, and cell division/cell shape again suggesting that all these processes are temporally  
379 and spatially connected. These data are consistent with the identification of coupled

380 transcription/translation in other bacteria, which may also integrate aspects of DNA replication  
381 [55-59]. Both YidC1 and YidC2 contribute to proper cell wall biosynthesis and cell morphology  
382 in *S. mutans* [9], thus capture of proteins in this category is consistent with previously described  
383 mutant phenotypes.

384 **Determination of YidC1 and YidC2 interactomes and functional annotation.** When proteins  
385 from all experiments were evaluated in composite, 88 were identified as being associated with  
386 both YidC1 and YidC2, while 123 or 131 were uniquely associated with YidC1 or YidC2,  
387 respectively (Fig. 4A). When possible, proteins were assigned to functional categories by  
388 DAVID analysis (Fig. 4B). The most prevalent functional category in both interactomes was  
389 transferase. Functional annotation also shows that the YidC2, compared to YidC1, interactome  
390 was enriched in a number of functional categories including ATP-binding proteins,  
391 metalloproteins, carbon metabolism, oxidoreductases, cell division, GTPase activity, and  
392 branched chain amino acid pathways. This may explain why the phenotypic consequence of  
393 elimination of YidC2 is far more pronounced than elimination of YidC1 [7, 8, 46]. In contrast,  
394 the only instances in which the YidC1 interactome equaled or exceeded that of YidC2 were in  
395 the transferase, and purine and pyrimidine metabolism categories. Of note, however, a greater  
396 number of proteins in the YidC1 interactome are either not annotated or have putative  
397 individualized functions that cannot be assigned to a broad category.

398 We also carried out a protein-protein interaction (PPI) network analysis using the  
399 STRING (Search Tool for the Retrieval of Interacting Genes/Proteins). YidC1 and YidC2, as  
400 well as all proteins experimentally identified as associating with either or both of them, were  
401 included in the uploaded datasets. The individual YidC1 and YidC2 STRING interactomes are  
402 shown in Fig. 5A and 5B, and the common interactome in Fig 5C. The majority of the proteins

403 we identified in the current study were included within the PPI networks predicted by STRING,  
404 thus giving us high confidence in the accuracy of the experimentally determined protein  
405 interactomes. Consistent with co-translational protein translocation pathways, the most intense  
406 nodes identified in all three PPI network predictions were largely comprised of ribosomal  
407 proteins and other components of the translation machinery. L2, which we determined by  
408 ELISA not to interact with the YidC C-terminal tails (Fig. S3), was not predicted by STRING  
409 analysis to interact with either YidC1 or YidC2. S1 however, is a predicted STRING interaction  
410 partner of L2, as well as of YidC1 and YidC2. S1 is therefore a likely bridging molecule since it  
411 was detected experimentally whenever L2 was found in association with either YidC1 or YidC2.

412 **Concluding Remarks and Apparent *S. mutans* Protein Translocation Pathways.** Most  
413 information regarding bacterial membrane protein translocation comes from the Gram-negative  
414 bacterium, *E. coli*; however, Gram-positive bacteria generally have two YidCs and, based on  
415 genomic sequences, a seemingly smaller holotranslocon whereby SecDF are lacking in  
416 streptococci and staphylococci. Our current results reveal that there are at least three putative  
417 pathways of membrane protein translocation in *S. mutans* : 1) SRP-YidC2, 2) SecY-YidC1, and  
418 3) YidC1 and/or 2 only (Fig. 6). Ribosomal proteins were associated with all three apparent  
419 pathways consistent with the well accepted idea that insertion of membrane proteins is co-  
420 translational. In *S. mutans*, the majority of membrane protein substrates appear to prefer the  
421 SecY-YidC1 pathway since most of the predicted membrane proteins we identified were present  
422 in in the lower SDS-PAGE region in gel shift experiments where SecY and YidC1 were also  
423 found. A SecY-YidC interaction has been reported in *E. coli* under conditions of SecYEG  
424 overexpression [17]. Although our data does not yet prove a direct interaction between SecY  
425 and YidC1, their co-capture under endogenous conditions strongly suggests them to be a part of

426 a common macromolecular complex. On a similar note, an SRP-YidC2 interaction was  
427 identified both by whole cell cross-linking gel shift, and GST-YidC2CT pull-down assays. Koch  
428 and coworkers also reported a cross-link between *E.coli* YidC and Ffh under endogenous  
429 conditions [17]. Our data are consistent with this result, and further demonstrate that there is a  
430 preference of YidC2 over YidC1 in working in concert with the SRP in the Gram-positive  
431 bacterium *S. mutans*. Eliminating YidC2 or SRP components apparently maim, but do not fully  
432 disable, this essential pathway. Hence YidC2 and SRP pathway deletion mutants are viable but  
433 stress sensitive, and double deletion of *yidC2* and *ffh* is lethal. Partitioning of a smaller number  
434 of putative substrates with the *S. mutans* SRP-YidC2 pathway components is consistent with the  
435 speculation that the SecY-YidC1 pathway is more likely the housekeeping mechanism for  
436 insertion of numerous membrane proteins under routine growth conditions, while the SRP-  
437 YidC2 pathway inserts membrane proteins necessary for survival of environmental stressors.  
438 We did not identify Ffh or FtsY as constituents of the YidC1/2 autonomous pathway; therefore,  
439 how such nascent substrate proteins are targeted to the membrane remains unclear. In  
440 mammalian cells, large ribosomal subunit proteins attach to the endoplasmic reticulum  
441 membrane to facilitate membrane targeting [60, 61]. We speculate therefore that a similar  
442 mechanism may exist in *S. mutans*. In support of this conjecture, L14, L16, and L31 were the  
443 only ribosomal proteins identified by gel shift assay in the middle region of the gel  
444 corresponding to the YidC1/2 autonomous pathway. Taken together, the current results add to  
445 our understanding of the organization and respective substrates of distinct protein transport  
446 pathways in a Gram-positive bacterium. This information will facilitate future research  
447 regarding the underlying biology of a prevalent oral pathogen.  
448

449

## Materials and Methods

450 **Bacterial strains and media.** *S. mutans* strains included NG8 [62], PC398 ( $\Delta yidC2$  in NG8),  
451 and UA159. Strain PC398 was generated by PCR amplifying the allelic replacement cassette  
452 locus of strain AH398 ( $\Delta yidC2$  in UA159) [7], transforming NG8 with the amplified DNA,  
453 selection on erythromycin, and sequence confirmation of the mutant construction. All cultures  
454 were grown at 37° C in Todd-Hewitt broth (BBL, Becton Dickinson) supplemented with 0.3%  
455 yeast extract (THYE). Erythromycin (10 µg/ml) was added when appropriate. *E. coli* strain  
456 BL21 was grown aerobically at 37° C in Luria-Bertani (LB) broth or agar supplemented with  
457 ampicillin (100 µg/ml) or kanamycin (50 µg/ml) where appropriate.

458 **Formaldehyde cross-linking and Western blotting of whole cell lysates.** Paraformaldehyde  
459 (Sigma-Aldrich) was added to 4% (w/v) in phosphate buffered saline (PBS), pH 7.4, and stirred  
460 at 65° C with drop by drop addition of 1M NaOH until dissolution was complete. The solution  
461 was cooled to room temperature (RT), adjusted to pH 7.4, filtered (0.22 µm), and stored at 4°C  
462 for up to 4 weeks. Fifty ml of cells from mid-log phase *S. mutans* cultures (OD<sub>600</sub> ~ 0.6) were  
463 harvested by centrifugation at 5,300 x g for 30 min at 4°C, and washed twice with 10 ml PBS.  
464 The cell pellet was resuspended in 9.6 ml 0.4% formaldehyde solution and incubated for 15 min  
465 at 37°C with gentle shaking (Biometra OV5 3107A INC). The optimal concentration of 0.4%  
466 formaldehyde was established in pilot titration experiments. The reaction was quenched by  
467 addition of 0.4 ml 250 mM Tris, pH 7.4 (final concentration of 10 mM), and incubation at 37°C  
468 for 15 min. Paraformaldehyde-treated cells were pelleted by centrifugation and washed twice  
469 with PBS as above and resuspended to a final volume of 1 ml. Control cells were handled in the  
470 same way without formaldehyde. Whole-cell lysates were prepared from the cross-linked and  
471 untreated cell suspensions by glass bead breakage in a Mini-Bead Beater 8 apparatus (BioSpec

472 Products, Inc., Bartlesville) for four 40 second cycles with 1 min cooling on ice between each  
473 cycle. Cell lysate samples were electrophoresed on 4-20% precast gels (Bio-Rad Laboratories,  
474 Hercules, CA) in Tris-Glycine-SDS buffer. Replicate gels were stained with Coomassie Blue R  
475 250 or transblotted onto Immobilon polyvinylidene difluoride (PVDF) membranes (Bio-Rad  
476 Laboratories, Hercules, CA), reacted with affinity-purified YidC1 or YidC2 C-terminal-specific  
477 polyclonal rabbit antibodies (1:1000) [26], or anti-Ffh or anti-FtsY polyclonal rabbit antisera  
478 (1:1000) [63], followed by horseradish peroxidase-labeled anti-rabbit IgG (MP Biomedicals,  
479 Irvine, CA) (1:5000), and developed using the enhanced-chemiluminescence (ECL) Western  
480 blotting system (GE Healthcare).

#### 481 **Coupling of anti-YidC2 antibodies to DynaBeads™ and immunocapture of protein**

482 **complexes.** Five mg of M-280 Tosylactivated Dynabeads™ (Invitrogen) were washed twice  
483 with 1 ml 0.1 M Na-phosphate buffer pH 7.4. The beads were coupled to affinity-purified rabbit  
484 polyclonal YidC2-specific antibodies generated against synthetic peptides corresponding to the  
485 C-terminal tail (NPPKPFKSNARKDITPQANNDKLLIT) and cytoplasmic loop 1 between TM2  
486 and TM3 (SEKMAAYLKPVFDPIQERMKNC). Beads were reacted at 37°C overnight with slow  
487 end over end rotation (Roto-Torque, Cole-Parmer, Chicago Illinois) in a final volume of 150 ul  
488 in 0.1 M Na-phosphate buffer pH 7.4 containing 50 ug of each purified antibody preparation and  
489 3 M ammonium sulfate. Following incubation, the tube was placed next to a magnet and the  
490 supernatant removed. Unbound antibodies were removed from the beads by washing first with 1  
491 ml PBS containing 0.5% TritonX-100, and secondly with freshly made 0.5 N NH<sub>4</sub>OH, 0.5 mM  
492 EDTA, until A<sub>280</sub> of the wash supernatant was zero. Ab-coated beads were washed three times  
493 with 1 ml PBS, resuspended in 100 µl PBS, and reacted with ~700 ul formaldehyde cross-linked  
494 whole cell lysate samples (~ 8 mg/ml) derived from *S. mutans* strain NG8 (wild type) or PC398

495 ( $\Delta yidC2$ ), or with control samples prepared without formaldehyde, for three hours at 4° C with  
496 gentle end over end rotation. Next, beads were separated with a magnet and washed six times  
497 with 1 ml PBS. Ab-captured proteins were eluted with 0.5 ml freshly made 0.5 N NH<sub>4</sub>OH, 0.5  
498 mM EDTA, and vortexing in an Eppendorf tube adapter (Vortex Mixer, Fisher Scientific) set at  
499 medium speed for 20 min at RT. Beads were removed with a magnet and the eluate was snap-  
500 frozen in liquid nitrogen and dried overnight at RT in a SpeedVac vacuum concentrator (Savant,  
501 Famingdale, NY). Twenty microliters of SDS sample buffer (62.5 mM Tris pH 6.8, 10 %  
502 Glycerol, 0.2 % SDS, 0.02% Bromphenol Blue) were added to each dried sample and incubated  
503 for 10 min at 65°C. The samples were electrophoresed on 4-20% gradient SDS-polyacrylamide  
504 gels (Bio-Rad, Hercules, CA) and analyzed by Western blot using anti-YidC2 C-terminal-  
505 specific antibodies as described above. Controls included non-cross-linked samples prepared  
506 without formaldehyde, and a Western blot developed with HRP-conjugated goat anti-rabbit  
507 secondary antibody only.

#### 508 **Preparation of gel slices for protein identification by mass spectrometry. SDS**

509 polyacrylamide gels were rinsed in Optima LC-MS grade water (Fisher Scientific) three times,  
510 fixed for 15 min with 50% methanol and 7% acetic acid (Fisher Scientific), and stained with  
511 GelCode, Blue Stain Reagent (Thermo Scientific) according to the manufacturer's instructions.  
512 Gel slices corresponding to gel-shifted regions identified by Western blot with anti-YidC1,  
513 YidC2, Ffh or FtsY-specific antibodies in the formaldehyde cross-linked UA159 whole cell  
514 lysate, but absent from the non-cross-linked control sample, were excised for *in situ* proteolysis.  
515 Similarly, a band detected by Western blot with anti-YidC2 antibodies in the DynaBead™ eluate  
516 of the NG8 formaldehyde cross-linked sample, but not the  $\Delta yidC2$  mutant strain or non-cross-  
517 linked control samples, was excised for proteolysis from the same location of SDS-

518 polyacrylamide gels of all four samples. Gel slices were washed twice in nanopure water for 5  
519 minutes, then destained with 1:1 v/v methanol: 50 mM ammonium bicarbonate for ten minutes  
520 with two changes. Gel slices were dehydrated with 1:1 v/v acetonitrile: 50 mM ammonium  
521 bicarbonate, then rehydrated and incubated with dithiothreitol (DTT) solution (25 mM in 100  
522 mM ammonium bicarbonate) for 30 minutes prior to the addition of 55 mM Iodoacetamide in  
523 100 mM ammonium bicarbonate solution. Gel slices were incubated for an additional 30 min in  
524 the dark then washed with two cycles of water and dehydrated with 1:1 v/v acetonitrile: 50 mM  
525 ammonium bicarbonate. Protease was driven into the gel pieces by rehydrating them in 12 ng/ml  
526 trypsin in 0.01% ProteaseMAX Surfactant (Promega) for 5 minutes. Gel pieces were next  
527 overlaid with 40  $\mu$ L of 0.01% ProteaseMAX surfactant: 50 mM ammonium bicarbonate and  
528 gently mixed on an orbital shaker for 1 hour. The digestion was stopped by addition of 0.5%  
529 trifluoroacetic acid. MS analysis was performed immediately to ensure high quality tryptic  
530 peptides with minimal non-specific cleavage.

531 **Mass spectrometry analysis.** Nano-liquid chromatography tandem mass spectrometry (Nano-  
532 LC/MS/MS) was performed on a Thermo Scientific Q Exactive HF Orbitrap mass spectrometer  
533 equipped with an EASY Spray nanospray source (Thermo Scientific) operated in positive ion  
534 mode, or on a Quadrupole-ToF (Q-TOF) instrument. The LC system was an UltiMate™ 3000  
535 RSLCnano system from Thermo Scientific. The mobile phase A was water containing 0.1%  
536 formic acid acetic acid and the mobile phase B was acetonitrile with 0.1% formic acid. Five  
537 microliters of each sample was first injected on to a Thermo Fisher Scientific Acclaim Trap  
538 Cartridge (C18 column, 75  $\mu$ m ID, 2 cm length, 3  $\mu$ m 100 Å pore size) and washed with mobile  
539 phase A to desalt and concentrate the peptides. The injector port was switched to inject and the  
540 peptides were eluted off of the trap onto the column. An EASY Spray PepMAP column from



541 Thermo Scientific was used for chromatographic separations (C18, 75  $\mu\text{m}$  ID, 25 cm length, 3  
542  $\mu\text{m}$  100  $\text{\AA}$  pore size). The column temperature was maintained 35° C as peptides were eluted  
543 directly off the column into the LTQ system using a gradient of 2-80%B over 45 minutes, with a  
544 flow rate of 300 nL/min. The total run time was 60 minutes. The MS/MS was acquired according  
545 to standard conditions established in the lab. The EASY Spray source operated with a spray  
546 voltage of 1.5 KV and a capillary temperature of 200° C. The scan sequence of the mass  
547 spectrometer was based on the TopTen™ method; the analysis was programmed for a full scan  
548 recorded between 350 – 2000 Da, and a MS/MS scan to generate product ion spectra to  
549 determine amino acid sequence in consecutive instrument scans of the ten most abundant peak in  
550 the spectrum. The AGC Target ion number was set at 30,000 ions for full scan and 10,000 ions  
551 for MSn mode. Maximum ion injection time was set at 20 ms for full scan and 300 ms for MSn  
552 mode. Micro scan number was set at 1 for both full scan and MSn scan. The CID fragmentation  
553 energy was set to 35%. Dynamic exclusion was enabled with a repeat count of 1 within 10  
554 seconds, a mass list size of 200, and an exclusion duration 350 seconds. The low mass width was  
555 0.5 and the high mass width was 1.5.

556 **Database searching.** All MS/MS samples were analyzed using Sequest (XCorr Only) (Thermo  
557 Fisher Scientific, San Jose, CA, USA; version IseNode in Proteome Discoverer 2.2.0.388 or  
558 Mascot Server 2.7). Sequest (XCorr Only) was set up to search *Streptococcus mutans* UA159 or  
559 NG8 (GenBank: AE014133.2 GenBank: CP013237.1, respectively). Sequest (XCorr Only) was  
560 searched with a fragment ion mass tolerance of 0.020 Da and a parent ion tolerance of 10.0 PPM.

561 **Criteria for protein identification.** Scaffold (version Scaffold\_4.8.6, Proteome Software Inc.,  
562 Portland, OR) was used to validate MS/MS based peptide and protein identifications. Peptide  
563 identifications were accepted if they could be established at greater than 95.0% probability by

564 the Peptide Prophet algorithm [64] with Scaffold delta-mass correction. Protein identifications  
565 were accepted if they could be established at greater than 99.0% probability and contained at  
566 least 1 identified peptide. Protein probabilities were assigned by the Protein Prophet algorithm  
567 [65] .

568 **Two-dimensional difference gel electrophoresis (DIGE) analysis of *S. mutans* proteins**  
569 **captured with GST-YidC1 compared to GST-YidC2 C-terminal tail fusion proteins.** The  
570 C-terminal fragment (bp682-816) of *yidC1* was amplified by PCR using primers NL5F  
571 (ggaacggatcccaggtcttccagattctgttg) and NL5R (ccgtagtcgacttatttctcttttatgtgcttc). The C-  
572 terminal fragment (bp742-933) of *yidC2* was amplified by PCR using primers NL6F  
573 (ggaacggatccacaaacatattcattaaacaaaat) and NL6Rb (ccgtagtcgacttattgcttatggtgacgctgt). *S.*  
574 *mutans* UA159 genomic DNA was used as the template. PCR products were digested with  
575 *Bam*HI and *Sal*I and ligated to corresponding restriction enzyme sites in the pGEX-4T-2 vector.  
576 The vector only encoding GST was transformed into BL21 DE3 (ThermoFisher Scientific).  
577 Plasmids encoding GST-YidC1CT or GST-YidC2CT were transformed into BL21 Star™  
578 (ThermoFisher). GST-YidC1CT expression was induced with 0.5 mM isopropyl-β-D-  
579 thiogalactopyranoside (IPTG) for 6 hours at 30° C. Expression of GST and GST-YidC2CT was  
580 induced with 1 mM IPTG for 4 hours at 37° C. Cells were harvested by centrifugation at 11,325  
581 x g for 15 min, and resuspended in 25 ml PBS. Cell suspensions were supplemented with 1 mM  
582 phenylmethylsulfonyl fluoride (PMSF) (Acros Organics) and protease inhibitor cocktail (1 mini  
583 tablet/25 ml) (Roche Diagnostics GmbH). Cell lysis was performed using an Avestin  
584 EmulsiFlex-C5 high-pressure homogenizer (Avestin Inc., Ottawa, Ontario, Canada) at a pressure  
585 of 15,000-20,000 p.s.i. for three cycles. Cell debris was removed by centrifugation at 11,000 x g  
586 for 30 min and the supernatants filtered through a 0.22 μm syringe filter (Merck Millipore).

587 Recombinant proteins were purified on an AKTA Purifier system (GE Healthcare) using a  
588 GSTrap column and elution with 50 mM Tris-HCl, 10 mM reduced glutathione pH 8.0. Purified  
589 proteins were dialyzed in equilibration buffer (50 mM Tris, 150 mM NaCl, pH 8.0) and  
590 incubated with Pierce® Glutathione Spin Columns (Thermo Scientific) at RT for 1 hour with  
591 gentle rotation according to the manufacturer's instructions. A fresh whole cell lysate of *S.*  
592 *mutans* UA159 was filtered through a 0.22 µm syringe filter (Merck Millipore) and incubated  
593 with the GST and GST fusion proteins bound Glutathione Spin Columns overnight at 4°C with  
594 gentle rotation. The column was washed four times with PBS and bound proteins were eluted  
595 with 50 mM Tris, 150 mM NaCl, pH8 containing 10 mM reduced glutathione. Eluates were  
596 separated by electrophoresis through 4-20% gradient SDS-polyacrylamide gels (Bio-Rad,  
597 Hercules, CA) and visualized by Coomassie blue staining to confirm protein capture, then sent to  
598 Applied Biomics (Hayward, CA) on dry ice for proteomic analysis. Proteins captured with GST,  
599 GST-YidC1CT, or GST-YidC2CT were labeled with CyDye DIGE blue Cy5, red Cy3, or green  
600 cy2 fluors respectively, separated on a single 2D gel electrophoresis and the gel was analyzed for  
601 spot picking, followed by trypsin digestion for Mass Spectrometry protein identification.  
602 Peptides were subjected to tandem matrix-assisted laser desorption ionization-time of flight  
603 (MALDI-TOF) for peptide mass fingerprinting and MALDI-TOF/TOF for identification of  
604 peptide sequences which were searched against *S. mutans* UA159 database from NCBI and  
605 SwissProt using MASCOT search engine (Matrix Science). Proteins with Protein Score or Total  
606 Ion, confidence interval (C.I.) greater than 95% were considered significant.

607 **Bioinformatic analyses.** Amino acid sequences of proteins identified in all the experiments were  
608 downloaded from the *S. mutans* strain NG8 assembly database  
609 (<https://www.ncbi.nlm.nih.gov/nuccore/CP013237.1>) or UA159 assembly database

610 (<https://www.ncbi.nlm.nih.gov/nucore/AE014133.2>), and analyzed for the presence and  
611 number of transmembrane domains using the webtool, TMHMM v2.0 [66]. Functional analysis  
612 of proteins was conducted using the Database for Annotation, Visualization, and Integrated  
613 Discovery (DAVID) bioinformatics tool 6.8 (<http://david.abcc.ncifcrf.gov/>) [67]. Protein-protein  
614 interaction (PPI) network analysis was performed using the STRING (Search Tool for the  
615 Retrieval of Interacting Genes/Proteins) database with a minimum required interaction score set  
616 to high confidence (0.700) [68]. YidC1 and YidC2 were manually added to the respective  
617 analyses as these proteins themselves were not the part of uploaded datasets.

618 **Expression and purification of recombinant proteins.** Recombinant *E. coli* were induced to  
619 produce 50S ribosomal protein L2 or trL2 with 0.05 mM IPTG at RT overnight. Bacterial cells  
620 were harvested by centrifugation at 11,325 x g for 15 min, and resuspended in 25 ml 50 mM  
621 sodium phosphate, 300 mM sodium chloride, 10 mM imidazole, pH 7.4, supplemented with 1  
622 mM phenylmethylsulfonyl fluoride (PMSF) (Acros Organics) and protease inhibitor cocktail (1  
623 mini tablet/25 ml) (Roche Diagnostics GmbH). Cell lysis was performed using an Avestin  
624 EmulsiFlex-C5 high-pressure homogenizer (Avestin Inc., Ottawa, Ontario, Canada) at a pressure  
625 of 15,000-20,000 p.s.i. for three cycles. Cell debris was removed by centrifugation and the  
626 supernatant was filtered through a 0.22 µm syringe filter (Merck Millipore). Recombinant  
627 proteins were purified on an AKTA Purifier system (GE Healthcare) using a HiTrap TALON  
628 column and eluted with 50 mM sodium phosphate, 300 mM sodium chloride, Ph. 7.4, containing  
629 150 mM imidazole.

### 630 **Acknowledgements**

631 This work was supported by NIH NIDCR award DE008007 to LJB and funding from NIH S10  
632 OD021758 to the University of Florida Mass Spectrometry Research and Education Center. We

633 thank Dr. Kari B. Basso and Dr. Manasi Kamat of the Department of Chemistry, University of  
634 Florida for technical expertise and mass spectrometry sample analysis.

## 635 **References**

- 636 1. Ozdemir, D., *Dental Caries : The most Common Disease Worldwide and Preventive*  
637 *Strategies*. International Journal of Biology, 2013. **5**(No. 4): p. 55-61.
- 638 2. Lemos, J.A., et al., *The Biology of Streptococcus mutans*. Microbiol Spectr, 2019. **7**(1).
- 639 3. Akopian, D., et al., *Signal recognition particle: an essential protein-targeting machine*.  
640 *Annu Rev Biochem*, 2013. **82**: p. 693-721.
- 641 4. Steinberg, R., et al., *Co-translational protein targeting in bacteria*. FEMS Microbiol Lett,  
642 2018. **365**(11).
- 643 5. Lewis, N.E. and L.J. Brady, *Breaking the bacterial protein targeting and translocation*  
644 *model: oral organisms as a case in point*. Mol Oral Microbiol, 2015. **30**(3): p. 186-97.
- 645 6. Gutierrez, J.A., et al., *Insertional mutagenesis and recovery of interrupted genes of*  
646 *Streptococcus mutans by using transposon Tn917: preliminary characterization of*  
647 *mutants displaying acid sensitivity and nutritional requirements*. J Bacteriol, 1996.  
648 **178**(14): p. 4166-75.
- 649 7. Hasona, A., et al., *Streptococcal viability and diminished stress tolerance in mutants*  
650 *lacking the signal recognition particle pathway or YidC2*. Proc Natl Acad Sci U S A,  
651 2005. **102**(48): p. 17466-71.
- 652 8. Palmer, S.R., et al., *YidC1 and YidC2 are functionally distinct proteins involved in*  
653 *protein secretion, biofilm formation and cariogenicity of Streptococcus mutans*.  
654 *Microbiology*, 2012. **158**(Pt 7): p. 1702-1712.
- 655 9. Palmer, S.R., et al., *Streptococcus mutans yidC1 and yidC2 Impact Cell Envelope*  
656 *Biogenesis, the Biofilm Matrix, and Biofilm Biophysical Properties*. J Bacteriol, 2019.  
657 **201**(1).
- 658 10. Mishra, S., et al., *Membrane proteomic analysis reveals overlapping and independent*  
659 *functions of Streptococcus mutans Ffh, YidC1, and YidC2*. Mol Oral Microbiol, 2019.  
660 **34**(4): p. 131-152.
- 661 11. Samuelson, J.C., et al., *YidC mediates membrane protein insertion in bacteria*. Nature,  
662 2000. **406**(6796): p. 637-41.
- 663 12. Saller, M.J., et al., *Bacillus subtilis YqjG is required for genetic competence development*.  
664 *Proteomics*, 2011. **11**(2): p. 270-82.
- 665 13. Serek, J., et al., *Escherichia coli YidC is a membrane insertase for Sec-independent*  
666 *proteins*. EMBO J, 2004. **23**(2): p. 294-301.
- 667 14. Kuhn, A., H.G. Koch, and R.E. Dalbey, *Targeting and Insertion of Membrane Proteins*.  
668 *EcoSal Plus*, 2017. **7**(2).
- 669 15. Sachelaru, I., et al., *YidC occupies the lateral gate of the SecYEG translocon and is*  
670 *sequentially displaced by a nascent membrane protein*. J Biol Chem, 2013. **288**(23): p.  
671 16295-307.
- 672 16. Li, Z., et al., *Identification of YidC residues that define interactions with the Sec*  
673 *Apparatus*. J Bacteriol, 2014. **196**(2): p. 367-77.
- 674 17. Petriman, N.A., et al., *The interaction network of the YidC insertase with the SecYEG*  
675 *translocon, SRP and the SRP receptor FtsY*. Sci Rep, 2018. **8**(1): p. 578.

- 676 18. Welte, T., et al., *Promiscuous targeting of polytopic membrane proteins to SecYEG or*  
677 *YidC by the Escherichia coli signal recognition particle*. Mol Biol Cell, 2012. **23**(3): p.  
678 464-79.
- 679 19. Chen, M., et al., *Direct interaction of YidC with the Sec-independent Pf3 coat protein*  
680 *during its membrane protein insertion*. J Biol Chem, 2002. **277**(10): p. 7670-5.
- 681 20. Yi, L., et al., *YidC is strictly required for membrane insertion of subunits a and c of the*  
682 *F(1)F(0)ATP synthase and SecE of the SecYEG translocase*. Biochemistry, 2003. **42**(35):  
683 p. 10537-44.
- 684 21. Facey, S.J., et al., *The mechanosensitive channel protein MscL is targeted by the SRP to*  
685 *the novel YidC membrane insertion pathway of Escherichia coli*. J Mol Biol, 2007.  
686 **365**(4): p. 995-1004.
- 687 22. Stiegler, N., R.E. Dalbey, and A. Kuhn, *M13 procoat protein insertion into YidC and*  
688 *SecYEG proteoliposomes and liposomes*. J Mol Biol, 2011. **406**(3): p. 362-70.
- 689 23. Aschtgen, M.S., et al., *The C-tail anchored TssL subunit, an essential protein of the*  
690 *enteroaggregative Escherichia coli Sci-1 Type VI secretion system, is inserted by YidC*.  
691 Microbiologyopen, 2012. **1**(1): p. 71-82.
- 692 24. Chiba, S. and K. Ito, *MifM monitors total YidC activities of Bacillus subtilis, including*  
693 *that of YidC2, the target of regulation*. J Bacteriol, 2015. **197**(1): p. 99-107.
- 694 25. Celebi, N., et al., *Membrane biogenesis of subunit II of cytochrome bo oxidase:*  
695 *contrasting requirements for insertion of N-terminal and C-terminal domains*. J Mol  
696 Biol, 2006. **357**(5): p. 1428-36.
- 697 26. Dong, Y., et al., *Functional overlap but lack of complete cross-complementation of*  
698 *Streptococcus mutans and Escherichia coli YidC orthologs*. J Bacteriol, 2008. **190**(7): p.  
699 2458-69.
- 700 27. Funes, S., et al., *Independent gene duplications of the YidC/Oxa/Alb3 family enabled a*  
701 *specialized cotranslational function*. Proc Natl Acad Sci U S A, 2009. **106**(16): p. 6656-  
702 61.
- 703 28. Saller, M.J., F. Fusetti, and A.J. Driessen, *Bacillus subtilis SpoIIIJ and YqjG function in*  
704 *membrane protein biogenesis*. J Bacteriol, 2009. **191**(21): p. 6749-57.
- 705 29. Kumazaki, K., et al., *Structural basis of Sec-independent membrane protein insertion by*  
706 *YidC*. Nature, 2014. **509**(7501): p. 516-20.
- 707 30. Shimokawa-Chiba, N., et al., *Hydrophilic microenvironment required for the channel-*  
708 *independent insertase function of YidC protein*. Proc Natl Acad Sci U S A, 2015.  
709 **112**(16): p. 5063-8.
- 710 31. Borowska, M.T., et al., *A YidC-like Protein in the Archaeal Plasma Membrane*.  
711 Structure, 2015. **23**(9): p. 1715-1724.
- 712 32. Oliver, D.C. and M. Paetzel, *Crystal structure of the major periplasmic domain of the*  
713 *bacterial membrane protein assembly facilitator YidC*. J Biol Chem, 2008. **283**(8): p.  
714 5208-16.
- 715 33. Kumazaki, K., et al., *Crystal structure of Escherichia coli YidC, a membrane protein*  
716 *chaperone and insertase*. Sci Rep, 2014. **4**: p. 7299.
- 717 34. Xin, Y., et al., *Structure of YidC from Thermotoga maritima and its implications for*  
718 *YidC-mediated membrane protein insertion*. FASEB J, 2018. **32**(5): p. 2411-2421.
- 719 35. Tanaka, Y., et al., *2.8-A crystal structure of Escherichia coli YidC revealing all core*  
720 *regions, including flexible C2 loop*. Biochem Biophys Res Commun, 2018. **505**(1): p.  
721 141-145.

- 722 36. Sachelaru, I., et al., *YidC and SecYEG form a heterotetrameric protein translocation*  
723 *channel*. Sci Rep, 2017. **7**(1): p. 101.
- 724 37. Jauss, B., et al., *Noncompetitive binding of PpiD and YidC to the SecYEG translocon*  
725 *expands the global view on the SecYEG interactome in Escherichia coli*. J Biol Chem,  
726 2019. **294**(50): p. 19167-19183.
- 727 38. Komar, J., et al., *Membrane protein insertion and assembly by the bacterial holo-*  
728 *translocon SecYEG-SecDF-YajC-YidC*. Biochem J, 2016. **473**(19): p. 3341-54.
- 729 39. Berger, I., et al., *Multiprotein Complex Production in E. coli: The SecYEG-SecDFYajC-*  
730 *YidC Holotranslocon*. Methods Mol Biol, 2017. **1586**: p. 279-290.
- 731 40. Schulze, R.J., et al., *Membrane protein insertion and proton-motive-force-dependent*  
732 *secretion through the bacterial holo-translocon SecYEG-SecDF-YajC-YidC*. Proc Natl  
733 Acad Sci U S A, 2014. **111**(13): p. 4844-9.
- 734 41. Scotti, P.A., et al., *YidC, the Escherichia coli homologue of mitochondrial Oxa1p, is a*  
735 *component of the Sec translocase*. EMBO J, 2000. **19**(4): p. 542-9.
- 736 42. Schiebel, E., et al., *Delta mu H<sup>+</sup> and ATP function at different steps of the catalytic cycle*  
737 *of preprotein translocase*. Cell, 1991. **64**(5): p. 927-39.
- 738 43. van der Wolk, J.P., et al., *The low-affinity ATP binding site of the Escherichia coli SecA*  
739 *dimer is localized at the subunit interface*. Biochemistry, 1997. **36**(48): p. 14924-9.
- 740 44. Knupffer, L., et al., *Molecular Mimicry of SecA and Signal Recognition Particle Binding*  
741 *to the Bacterial Ribosome*. mBio, 2019. **10**(4).
- 742 45. Ernst, S., et al., *YidC-driven membrane insertion of single fluorescent Pf3 coat proteins*. J  
743 Mol Biol, 2011. **412**(2): p. 165-75.
- 744 46. Crowley, P.J. and L.J. Brady, *Evaluation of the effects of Streptococcus mutans*  
745 *chaperones and protein secretion machinery components on cell surface protein*  
746 *biogenesis, competence, and mutacin production*. Mol Oral Microbiol, 2016. **31**(1): p.  
747 59-77.
- 748 47. Buskiewicz, I., et al., *Trigger factor binds to ribosome-signal-recognition particle (SRP)*  
749 *complexes and is excluded by binding of the SRP receptor*. Proc Natl Acad Sci U S A,  
750 2004. **101**(21): p. 7902-6.
- 751 48. Bornemann, T., W. Holtkamp, and W. Wintermeyer, *Interplay between trigger factor and*  
752 *other protein biogenesis factors on the ribosome*. Nat Commun, 2014. **5**: p. 4180.
- 753 49. Hoffman, E.A., et al., *Formaldehyde crosslinking: a tool for the study of chromatin*  
754 *complexes*. J Biol Chem, 2015. **290**(44): p. 26404-11.
- 755 50. Timp, W.a.T., G., *Beyond mass spectrometry, the next step in proteomics*.  
756 ScienceAdvances, 2020. **6**(2): p. 1.
- 757 51. Wu, Z.C., et al., *Interaction of Streptococcus mutans YidC1 and YidC2 with translating*  
758 *and nontranslating ribosomes*. J Bacteriol, 2013. **195**(19): p. 4545-51.
- 759 52. Rippa, V., et al., *The ribosomal protein L2 interacts with the RNA polymerase alpha*  
760 *subunit and acts as a transcription modulator in Escherichia coli*. J Bacteriol, 2010.  
761 **192**(7): p. 1882-9.
- 762 53. Motojima-Miyazaki, Y., M. Yoshida, and F. Motojima, *Ribosomal protein L2 associates*  
763 *with E. coli HtpG and activates its ATPase activity*. Biochem Biophys Res Commun,  
764 2010. **400**(2): p. 241-5.
- 765 54. Chodavarapu, S., M.M. Felczak, and J.M. Kaguni, *Two forms of ribosomal protein L2 of*  
766 *Escherichia coli that inhibit DnaA in DNA replication*. Nucleic Acids Res, 2011. **39**(10):  
767 p. 4180-91.

- 768 55. Castro-Roa, D. and N. Zenkin, *In vitro experimental system for analysis of transcription-*  
769 *translation coupling*. Nucleic Acids Res, 2012. **40**(6): p. e45.
- 770 56. Fujiwara, K., et al., *In vitro transcription-translation using bacterial genome as a*  
771 *template to reconstitute intracellular profile*. Nucleic Acids Res, 2017. **45**(19): p. 11449-  
772 11458.
- 773 57. Wang, T., et al., *Dynamics of transcription-translation coordination tune bacterial indole*  
774 *signaling*. Nat Chem Biol, 2019.
- 775 58. Sankar, T.S., et al., *The nature of mutations induced by replication-transcription*  
776 *collisions*. Nature, 2016. **535**(7610): p. 178-81.
- 777 59. Mikhaylina, A.O., et al., *Investigation of the regulatory function of archaeal ribosomal*  
778 *protein L4*. Biochemistry (Mosc), 2014. **79**(1): p. 69-76.
- 779 60. Potter, M.D., R.M. Seiser, and C.V. Nicchitta, *Ribosome exchange revisited: a*  
780 *mechanism for translation-coupled ribosome detachment from the ER membrane*. Trends  
781 Cell Biol, 2001. **11**(3): p. 112-5.
- 782 61. Seiser, R.M. and C.V. Nicchitta, *The fate of membrane-bound ribosomes following the*  
783 *termination of protein synthesis*. J Biol Chem, 2000. **275**(43): p. 33820-7.
- 784 62. Knox, K.W., L.N. Hardy, and A.J. Wicken, *Comparative studies on the protein profiles*  
785 *and hydrophobicity of strains of Streptococcus mutans serotype c*. J Gen Microbiol, 1986.  
786 **132**(9): p. 2541-8.
- 787 63. Williams, M.L., et al., *YlxM is a newly identified accessory protein that influences the*  
788 *function of signal recognition particle pathway components in Streptococcus mutans*. J  
789 Bacteriol, 2014. **196**(11): p. 2043-52.
- 790 64. Keller, A., et al., *Empirical statistical model to estimate the accuracy of peptide*  
791 *identifications made by MS/MS and database search*. Anal Chem, 2002. **74**(20): p. 5383-  
792 92.
- 793 65. Nesvizhskii, A.I., et al., *A statistical model for identifying proteins by tandem mass*  
794 *spectrometry*. Anal Chem, 2003. **75**(17): p. 4646-58.
- 795 66. Krogh, A., et al., *Predicting transmembrane protein topology with a hidden Markov*  
796 *model: application to complete genomes*. J Mol Biol, 2001. **305**(3): p. 567-80.
- 797 67. Huang, D.W., et al., *The DAVID gene functional classification tool: a novel biological*  
798 *module-centric algorithm to functionally analyze large gene lists*. Genome Biol, 2007.  
799 **8**(9): p. R183.
- 800 68. Szklarczyk, D., et al., *STRING v10: protein-protein interaction networks, integrated over*  
801 *the tree of life*. Nucleic Acids Res, 2015. **43**(Database issue): D447-452.

## 804 **Figure legends**

### 805 **Fig. 1. Formaldehyde cross-linking of *S. mutans* results in gel shifts of protein**

806 **translocation machinery components present in whole cell lysates.** (A) Whole cell lysates of

807 untreated (-) *S. mutans* strain UA159 or cells treated with 0.4% formaldehyde (+) were analyzed

808 by Western blot using anti-YidC1, anti-YidC2, anti-Ffh and anti-FtsY antibodies. Brackets



809 indicate regions of reactivity subjected to further analysis. Bands corresponding to YidC1, (24  
810 kDa), YidC2 (27 kDa), Ffh (54 kDa), and Ftsy (75 kDa) are apparent in untreated and  
811 formaldehyde cross-linked samples. **(B)** Corresponding Coomassie blue stained SDS-  
812 polyacrylamide gel indicating location of excised gel slices sent for mass spectrometry analysis.  
813 **(C)** Histogram showing number of proteins in indicated categories in upper, middle and lower  
814 excised gel slices.

815

816 **Fig. 2. Immunocapture of YidC2 and associated protein complexes from whole cell lysates**  
817 **(WCL) of *S. mutans* using anti-YidC2 antibodies coupled to Dynabeads™.** **(A)** SDS-PAGE.  
818 Dynabeads™ conjugated with anti-YidC2 antibodies were reacted with whole cell lysates from  
819 untreated (-) or 0.4% formaldehyde cross-linked (+) wild-type *S. mutans* strain NG8 (WT) or  
820 corresponding  $\Delta yidC2$  mutant and eluted with 0.5 N NH<sub>4</sub>OH, 0.5 mM EDTA. Migration of  
821 molecular weight standards is indicated. **(B)** Western blot of samples shown in (A). Thick  
822 arrow indicates YidC2. Thin arrow indicates the gel-shifted band seen only in the cross-linked  
823 sample from the WT strain. This region was excised for each of the four samples from the  
824 Coomassie blue gel, stained, and subjected to mass spectrometry analysis. **(C)** A replicate  
825 negative control Western blot probed with goat anti-rabbit secondary antibodies identifies the  
826 migration of anti-YidC2 antibodies that leached from the column during the elution step. **(D)**  
827 Histogram showing the types of proteins co-captured with YidC2 from the WT strain.

828

829 **Fig. 3. Proteins co-captured with GST, GST-YidC1CT or GST-YidC2CT analyzed by 2D-**  
830 **DIGE.** **(A)** *S. mutans* whole cell lysates were reacted with the indicated GST polypeptide and  
831 captured using glutathione affinity chromatography. The eluted samples were labeled with

832 CyDye DIGE fluors (YidC1CT with red Cy3, YidC2CT with green Cy2, and GST with blue  
833 Cy5), and separated on a single 2D gel, by isoelectric focusing in the first dimension and SDS-  
834 PAGE in the second dimension. Black and white images for each sample are shown. **(B)** Signals  
835 from each dye were scanned and the three images overlaid. One hundred and twenty separate  
836 spots (shown in Fig. S2) were excised from the gel for mass spectrometry analysis. **(C)** The  
837 numbers and types of proteins associated with GST-YIDC1CT compared to GST-YidC2CT are  
838 shown.

839

840 **Fig. 4. Comparison of YidC1 and YidC2 interactomes.** **(A)** Venn diagram illustrating the  
841 degree of overlap of proteins identified in YidC1 and YidC2 interactomes. **(B)** Distribution of  
842 proteins within the YidC1 and YidC2 interactomes among various functional categories (DAVID  
843 analysis).

844

845 **Fig. 5. Protein-protein interaction networks predicted by STRING analysis.** **(A)** YidC1  
846 interactome **(B)** YidC2 interactome **(C)** YidC1 and YidC2 shared interactome. Each protein  
847 experimentally determined in the current study to associate with YidC1 and/or YidC2 is depicted  
848 by a sphere with either name or SMU number indicated. YidC1 and YidC2 are highlighted in  
849 red. Lines indicate predicted interactions based on current information within the STRING  
850 database.

851

852 **Fig. 6. Model representation of putative co-translational membrane protein insertion**  
853 **pathways in *S. mutans*.** **(Left) SRP-YidC2 pathway.** YidC2 works in concert with the signal  
854 recognition particle (SRP) pathway. The SRP is comprised of Ffh, a small cytoplasmic RNA,

855 and the YlxM accessory protein present only in Gram-positive bacteria [63]. The SRP targets the  
856 ribosome nascent chain complex to the membrane via a reversible interaction of Ffh with the  
857 SRP receptor FtsY. The substrate protein is then passed to YidC2 for integration into the  
858 membrane. RopA and SecA fractionate with components of this pathway because of their  
859 common association with large ribosomal subunit proteins. **(Center) SecY-YidC1 pathway.**  
860 Integral membrane proteins are targeted to SecYEG with the help of RopA or other chaperones  
861 (DnaK, GroEL) and insertion into the membrane is facilitated by YidC1. **(Right) YidC1 and/or**  
862 **YidC2 autonomous pathway.** A small subset of membrane proteins with one or two  
863 transmembrane domains can be inserted into the membrane independently of SecYEG or the  
864 SRP.

865

866

867 **Table 1: Summary of proteins present in upper, middle, and lower molecular weight**  
 868 **regions, identified by Western blot gel shift assays of whole cell lysates of formaldehyde**  
 869 **cross-linked *S. mutans* detected with anti-YidC1, YidC2, Ffh, and FtsY-specific antibodies**

| <b>Upper Region:</b> reactive with anti-YidC2, Ffh and FtsY antibodies                       | <b>Middle Region:</b> reactive with YidC1 and YidC2 | <b>Lower Region:</b> reactive with anti-YidC1 antibodies                                     |
|----------------------------------------------------------------------------------------------|-----------------------------------------------------|----------------------------------------------------------------------------------------------|
| <b>Translation</b>                                                                           |                                                     |                                                                                              |
| 50S ribosomal protein L1 (SMU_1626)*                                                         | 50S ribosomal protein L1 (SMU_1626)*                | Putative ribosomal protein S1; sequence specific DNA-binding protein (SMU_1200) <sup>§</sup> |
| 50S Ribosomal Protein L2 (SMU_2167)*                                                         | 50S Ribosomal Protein L2 (SMU_2167)*                | Dimethyladenosine transferase, 16S rRNA methyltransferase (SMU_349)                          |
| 50S ribosomal protein L7/L12 (SMU_960)                                                       | 50S ribosomal protein L5 (SMU_2015)                 | Putative tRNA pseudouridine synthase A (SMU_84)                                              |
| Putative ribosomal protein S1; sequence specific DNA-binding protein (SMU_1200) <sup>§</sup> | 50S ribosomal protein L18 (SMU_2010)                | Translation elongation factor EF-Tu (SMU_714) <sup>§</sup>                                   |
| 30S ribosomal protein S3 (SMU_2021)*                                                         | 30S ribosomal protein S2 (SMU_2032)                 | Conserved hypothetical protein, 16S rRNA methyltransferase (SMU_1659c)                       |
| 30S ribosomal protein S5 (SMU_2009)                                                          | 30S ribosomal protein S3 (SMU_2021)*                |                                                                                              |
| 30S ribosomal protein S10 (SMU_2026c)                                                        | 30S ribosomal protein S13 (SMU_2003)                |                                                                                              |
| 30S ribosomal protein S11 (SMU_2002)                                                         |                                                     |                                                                                              |
| 30S ribosomal protein S18 (SMU_1858)                                                         |                                                     |                                                                                              |
| Translation elongation factor EF-Tu (SMU_714) <sup>§</sup>                                   |                                                     |                                                                                              |
| Translation elongation factor G (SMU_359)                                                    |                                                     |                                                                                              |
| Putative translation elongation factor TS (SMU_2031)                                         |                                                     |                                                                                              |
| Translation initiation factor 2 (SMU_421)                                                    |                                                     |                                                                                              |
| Putative translation initiation factor IF3 (SMU_697)                                         |                                                     |                                                                                              |
| Putative alanyl-tRNA synthetase (alanine--tRNA ligase) (SMU_650)                             |                                                     |                                                                                              |

|                                                                       |  |                                                                                                                                  |
|-----------------------------------------------------------------------|--|----------------------------------------------------------------------------------------------------------------------------------|
|                                                                       |  |                                                                                                                                  |
| <b>Translocation</b>                                                  |  |                                                                                                                                  |
| Preprotein translocase subunit SecA (SMU_1838)                        |  | Putative preprotein translocase SecY protein (SMU_2006)                                                                          |
|                                                                       |  | Putative secreted protein, preprotein translocase subunit YajC (SMU_1787c)                                                       |
|                                                                       |  | Putative signal peptidase II (SMU_1661c)                                                                                         |
| <b>Chaperones/proteases</b>                                           |  |                                                                                                                                  |
| Peptidyl-prolyl isomerase RopA (trigger factor) (SMU_91) <sup>§</sup> |  | Peptidyl-prolyl isomerase RopA (trigger factor) (SMU_91) <sup>§</sup>                                                            |
| Heat shock protein. DnaK (HSP-70) (SMU_82)                            |  | Putative chaperonin GroEL (SMU_1954) <sup>§</sup>                                                                                |
| Putative chaperonin GroEL (SMU_1954) <sup>§</sup>                     |  |                                                                                                                                  |
| <b>Cell division/cell shape</b>                                       |  |                                                                                                                                  |
| Putative septation ring formation regulator (SMU_1276c)               |  | Putative cell shape-determining protein MreC (SMU_20)                                                                            |
| Putative cell division protein DivIVA (SMU_557)                       |  | Putative cell division protein RodA (SMU_1279c)                                                                                  |
| Putative cell division protein FtsZ (SMU_552)                         |  | Integral membrane protein possibly involved in D-alanine export, D-alanyl-lipoteichoic acid biosynthesis protein DltB (SMU_1690) |
| Cell division protein FtsA (SMU_551)                                  |  | Putative cell division protein FtsH (SMU_15) <sup>§</sup>                                                                        |
| Putative cell division protein FtsH (SMU_15) <sup>§</sup>             |  | Conserved hypothetical protein cell division protein FtsW (SMU_172)                                                              |
| <b>DNA replication/repair</b>                                         |  |                                                                                                                                  |
| DNA-directed RNA polymerase, alpha subunit (SMU_2001)                 |  | Putative type II restriction endonuclease (SMU_506)                                                                              |
| DNA-dependent RNA polymerase, beta subunit (SMU_1990)                 |  | Putative site-specific DNA-methyltransferase (SMU_504)                                                                           |
| DNA-dependent RNA polymerase, beta' subunit (SMU_1989)                |  | Putative endonuclease III (DNA repair) (SMU_1650)                                                                                |

|                                                                                              |                                                                |                                                                                              |
|----------------------------------------------------------------------------------------------|----------------------------------------------------------------|----------------------------------------------------------------------------------------------|
| Recombination protein RecA (SMU_2085)                                                        |                                                                | Putative DNA polymerase III, delta subunit (SMU_1662)                                        |
| <b>Transcription</b>                                                                         |                                                                |                                                                                              |
| DNA-dependent RNA polymerase sigma subunit; major sigma factor (sigma 70/42) (SMU_822)       | DNA-dependent RNA polymerase. beta' subunit (SMU_1989)         | Conserved hypothetical protein, DNA-directed RNA polymerase subunit delta (SMU_1936c)        |
| Putative tRNA isopentenylpyrophosphate transferase, tRNA dimethylallyltransferase (SMU_1477) |                                                                |                                                                                              |
| <b>Putative substrates (proteins with one or more predicted transmembrane domains)</b>       |                                                                |                                                                                              |
| Putative septation ring formation regulator (SMU_1276c)                                      | Hypothetical protein (SMU_591c)*                               | Conserved hypothetical protein peptide ABC transporter substrate-binding protein (SMU_1447c) |
| Putative ABC transporter, permease protein (SMU_1007)                                        | Serine protease HtrA (SMU_2164)                                | Putative carbonic anhydrase precursor (SMU_1595)                                             |
| Putative PTS system, fructose-specific enzyme IIABC component (SMU_872)                      | Putative PTS system, mannose-specific component IID (SMU_1879) | Putative deacetylase (SMU_623c)                                                              |
| Hypothetical protein (SMU_591c)*                                                             | Hemolysin (SMU_1693)                                           | Conserved hypothetical protein, glycosyl transferase (SMU_834)                               |
| Putative ABC transporter, ATP-binding protein ComA (SMU_286)                                 | Hypothetical protein APQ13_07375 (ParE_toxin) (SMU_40)         | Putative PTS system, glucose-specific IIABC component (SMU_2047) <sup>§</sup>                |
| Conserved hypothetical protein, protease (SMU_235)                                           |                                                                | Hypothetical protein (SMU_832)                                                               |
| Putative cell division protein FtsH (SMU_15) <sup>§</sup>                                    |                                                                | Putative amino acid ABC transporter, periplasmic amino acid-binding protein (SMU_933)        |
| Putative PTS system, glucose-specific IIABC component (SMU_2047) <sup>§</sup>                |                                                                | Conserved hypothetical protein, cyclic nucleotide-binding protein (SMU_1307c)                |
| Putative PTS system, trehalose-specific IIABC component (SMU_2038)                           |                                                                | Putative cell shape-determining protein MreC (SMU_20)                                        |

|  |  |                                                                                                                                  |
|--|--|----------------------------------------------------------------------------------------------------------------------------------|
|  |  | Putative glycosyltransferase (SMU_833)                                                                                           |
|  |  | Conserved hypothetical protein (SMU_1477c)                                                                                       |
|  |  | Putative undecaprenyl-phosphate-UDP-MurNAc-Pentapeptide transferase (SMU_456)                                                    |
|  |  | Putative cell division protein RodA (SMU_1279c)                                                                                  |
|  |  | Integral membrane protein possibly involved in D-alanine export, D-alanyl-lipoteichoic acid biosynthesis protein DltB (SMU_1690) |
|  |  | Putative transmembrane protein, permease OppC (SMU_257)                                                                          |
|  |  | Conserved hypothetical protein (SMU_1111c)                                                                                       |
|  |  | Putative amino acid permease (SMU_1450)                                                                                          |
|  |  | Hypothetical protein (SMU_503c)                                                                                                  |
|  |  | Hypothetical protein (SMU_1249c)                                                                                                 |
|  |  | Putative preprotein translocase SecY protein (SMU_2006)                                                                          |
|  |  | Putative sodium/amino acid (alanine) symporter (SMU_1175)                                                                        |
|  |  | Putative glycosyl transferase N-acetylglucosaminyltransferase), RgpG (SMU_246)                                                   |
|  |  | Putative secreted protein, preprotein translocase subunit YajC (SMU_1787c)                                                       |
|  |  | Putative endolysin, N-acetylmuramoyl-L-alanine amidase (SMU_707c)                                                                |
|  |  | Putative manganese transporter (SMU_770c)                                                                                        |
|  |  | Putative serine/threonine protein kinase (SMU_484)                                                                               |

|  |  |                                                                                                            |
|--|--|------------------------------------------------------------------------------------------------------------|
|  |  | Putative cell division protein FtsH (SMU_15) <sup>§</sup>                                                  |
|  |  | Hypothetical protein (SMU_1161c)                                                                           |
|  |  | Putative drug-export protein; multidrug resistance protein, XRE family transcriptional regulator (SMU_745) |
|  |  | Putative ABC transporter, periplasmic ferrichrome-binding protein (SMU_998)                                |
|  |  | Cell wall-associated protein precursor WapA (SMU_2159)                                                     |

870

871 \*indicates proteins present in both upper and middle molecular weight gel slices.

872 <sup>§</sup>indicates proteins detected in regions reactive with both anti-YidC1 and anti-YidC2 antibodies.

873

874



875 **Table 2: List of proteins belonging to various functional categories uniquely present in the**  
 876 **formaldehyde cross-linked and non-cross-linked *S. mutans* wild-type (WT) whole cell**  
 877 **lysates, but absent from the *ΔyidC2* mutant strain by immunocapture with anti-YidC2**  
 878 **antibodies.**

|                                                                                                                                                                                                                                                                                                                                                                                                                                                                                                                                                                                                                                                                                                                                                                                                                                                                                                                                                          |
|----------------------------------------------------------------------------------------------------------------------------------------------------------------------------------------------------------------------------------------------------------------------------------------------------------------------------------------------------------------------------------------------------------------------------------------------------------------------------------------------------------------------------------------------------------------------------------------------------------------------------------------------------------------------------------------------------------------------------------------------------------------------------------------------------------------------------------------------------------------------------------------------------------------------------------------------------------|
| <b>Translation</b>                                                                                                                                                                                                                                                                                                                                                                                                                                                                                                                                                                                                                                                                                                                                                                                                                                                                                                                                       |
| 50S ribosomal protein L14 (SMU_2017)<br>50S ribosomal protein L31 type B (SMU_1298)<br>50S ribosomal protein L16 (SMU_2020)<br>tRNA uridine 5-carboxymethylaminomethyl modification protein (SMU_2141)                                                                                                                                                                                                                                                                                                                                                                                                                                                                                                                                                                                                                                                                                                                                                   |
| <b>Translocation</b>                                                                                                                                                                                                                                                                                                                                                                                                                                                                                                                                                                                                                                                                                                                                                                                                                                                                                                                                     |
| preprotein translocase subunit SecA (SMU_1838)<br>preprotein translocase subunit YajC (SMU_1787c)                                                                                                                                                                                                                                                                                                                                                                                                                                                                                                                                                                                                                                                                                                                                                                                                                                                        |
| <b>DNA replication/repair</b>                                                                                                                                                                                                                                                                                                                                                                                                                                                                                                                                                                                                                                                                                                                                                                                                                                                                                                                            |
| DNA-directed RNA polymerase subunit beta' (SMU_1989)<br>DNA repair protein RadA (SMU_327)<br>Deoxyribonuclease HsdR<br>DNA topoisomerase I (SMU_1002)<br>DNA topoisomerase IV subunit B (SMU_1277)                                                                                                                                                                                                                                                                                                                                                                                                                                                                                                                                                                                                                                                                                                                                                       |
| <b>Chaperones/Proteases</b>                                                                                                                                                                                                                                                                                                                                                                                                                                                                                                                                                                                                                                                                                                                                                                                                                                                                                                                              |
| metalloprotease RseP* (SMU_1784c)<br>ATP-dependent Clp protease ATP-binding subunit (SMU_956)                                                                                                                                                                                                                                                                                                                                                                                                                                                                                                                                                                                                                                                                                                                                                                                                                                                            |
| <b>Cell wall/cell shape/cell division</b>                                                                                                                                                                                                                                                                                                                                                                                                                                                                                                                                                                                                                                                                                                                                                                                                                                                                                                                |
| Penicillin-binding protein Pbp2b (SMU_597)<br>Peptidoglycan branched peptide synthesis protein MurM* (SMU_716)<br>septation ring formation regulator EzrA (SMU_1276c)<br>D-alanyl-lipoteichoic acid biosynthesis protein DltD (SMU_1688)<br>Rod shape-determining protein RodA (SMU_1279c)<br>cell division protein SepF (SMU_554)                                                                                                                                                                                                                                                                                                                                                                                                                                                                                                                                                                                                                       |
| <b>Putative substrates (with one or more predicted TM domains)</b>                                                                                                                                                                                                                                                                                                                                                                                                                                                                                                                                                                                                                                                                                                                                                                                                                                                                                       |
| Penicillin-binding protein (SMU_597)<br>Metalloprotease RseP* (SMU_1784c)<br>Septation ring formation regulator EzrA (SMU_1276c)<br>Cytoplasmic membrane protein, LemA (SMU_1930)<br>D-alanyl-lipoteichoic acid biosynthesis protein DltD (SMU_1688)<br>Serine/threonine protein kinase (SMU_484)<br>Preprotein translocase subunit YajC (SMU_1787c)<br>PTS mannose family transporter subunit IID (SMU_1879)<br>Hypothetical protein APQ13_00045 (SMU_1719c)<br>Acyltransferase (SMU_67)<br>ABC transporter permease (SMU_396)<br>Hypothetical protein APQ13_06235 (SMU_333)<br>Hypothetical protein APQ13_07285 (SMU_66)<br>PTS mannose transporter subunit IIC (SMU_1878)<br>Hemolysin (SMU_1693)<br>Phosphatidate cytidyltransferase (SMU_1785)<br>Murein hydrolase transporter LrgA (SMU_575c)<br>Glycosidase<br>Hypothetical protein APQ13_09110 (SMU_1856c)<br>Rod shape-determining protein RodA (SMU_1279c)<br>Hypothetical protein APQ13_07320 |

|                                                                                          |
|------------------------------------------------------------------------------------------|
| PAS domain-containing sensor histidine kinase (SMU_1516)<br>Histidine kinase (SMU_1145c) |
|------------------------------------------------------------------------------------------|

879 \*indicates proteins present in both cross-linked and non-cross-linked samples.

880

881

882 **Table 3: List of *S. mutans* proteins pulled down with GST-YidC1CT and/or GST-**  
 883 **YidC2CT, but not GST, identified by 2D-DIGE and mass spectrometry**

| <b>GST-YidC1-CT</b>                                                                                                                                                                                                                                                                                                                                                                                                                                                                                                                                                                                                                                                    | <b>GST-YidC2-CT</b>                                                                                                                                                                                |
|------------------------------------------------------------------------------------------------------------------------------------------------------------------------------------------------------------------------------------------------------------------------------------------------------------------------------------------------------------------------------------------------------------------------------------------------------------------------------------------------------------------------------------------------------------------------------------------------------------------------------------------------------------------------|----------------------------------------------------------------------------------------------------------------------------------------------------------------------------------------------------|
| <b>Translocation</b>                                                                                                                                                                                                                                                                                                                                                                                                                                                                                                                                                                                                                                                   |                                                                                                                                                                                                    |
|                                                                                                                                                                                                                                                                                                                                                                                                                                                                                                                                                                                                                                                                        | Signal recognition particle protein (SMU_1060)                                                                                                                                                     |
| <b>Translation</b>                                                                                                                                                                                                                                                                                                                                                                                                                                                                                                                                                                                                                                                     |                                                                                                                                                                                                    |
| 50S Ribosomal Protein L2 (SMU_2160)<br>50S ribosomal protein L6 (SMU_2011)<br>50S ribosomal protein L13 (SMU_169)<br>Putative ribosomal protein S1 (SMU_1200)<br>30S ribosomal protein S2 (SMU_2032)<br>30S ribosomal protein S4 (SMU_2135c)<br>30S ribosomal protein S7 (SMU_358)<br>30S ribosomal protein S8 (SMU_2012)<br>30S ribosomal protein S17 (SMU_2017)<br>30S ribosomal protein S21 (SMU_818)<br>Elongation factor Tu (SMU_714)<br>Phenylalanyl-tRNA synthetase subunit alpha (SMU_1512)<br>Glycyl-tRNA synthetase subunit alpha (SMU_445)<br>S1 RNA-binding domain-containing protein (smu_1623c)<br>tRNA (adenine(22)-N(1))-methyltransferase (SMU_1464c) | 50S Ribosomal Protein L2 (SMU_2160)<br>50S ribosomal protein L6 (SMU_2011)<br>50S ribosomal protein L13 (SMU_169)<br>30S ribosomal protein S7 (SMU_358)<br>30S ribosomal protein S17 (SMU_2017)    |
| <b>DNA replication/repair</b>                                                                                                                                                                                                                                                                                                                                                                                                                                                                                                                                                                                                                                          |                                                                                                                                                                                                    |
| DNA polymerase III, gamma/tau subunit (SMU_1581)<br>DNA polymerase III PolC (SMU_123)<br>DNA-directed RNA polymerase subunit alpha (SMU_2001)<br>DNA polymerase I (POL I) (SMU_297)<br>DNA repair protein RecN (SMU_585)<br>DNA mismatch repair protein MutS (SMU_2091c)                                                                                                                                                                                                                                                                                                                                                                                               | DNA polymerase III, gamma/tau subunit (SMU_1581)<br>DNA polymerase III PolC (SMU_123)<br>DNA-directed RNA polymerase subunit alpha (SMU_2001)<br>Holliday junction-specific endonuclease (SMU_469) |
| <b>Transcription</b>                                                                                                                                                                                                                                                                                                                                                                                                                                                                                                                                                                                                                                                   |                                                                                                                                                                                                    |
| Probable DNA-directed RNA polymerase subunit delta (SMU_96)                                                                                                                                                                                                                                                                                                                                                                                                                                                                                                                                                                                                            | Probable DNA-directed RNA polymerase subunit delta (SMU_96)                                                                                                                                        |
| <b>Chaperones/Proteases</b>                                                                                                                                                                                                                                                                                                                                                                                                                                                                                                                                                                                                                                            |                                                                                                                                                                                                    |
| molecular chaperone DnaK (SMU_82)<br>Chaperone protein ClpB (SMU_1425)<br>heat shock protein GrpE (SMU_81)                                                                                                                                                                                                                                                                                                                                                                                                                                                                                                                                                             | Molecular chaperone DnaK (SMU_82)                                                                                                                                                                  |
| <b>Cell wall/cell shape/cell division</b>                                                                                                                                                                                                                                                                                                                                                                                                                                                                                                                                                                                                                              |                                                                                                                                                                                                    |
| cell division protein FtsH (SMU_15)                                                                                                                                                                                                                                                                                                                                                                                                                                                                                                                                                                                                                                    | cell division protein FtsH (SMU_15)                                                                                                                                                                |
| <b>Putative substrates (with one or more predicted TM domains)</b>                                                                                                                                                                                                                                                                                                                                                                                                                                                                                                                                                                                                     |                                                                                                                                                                                                    |

|                                                                                                                                                                                                                                                                                                                                                                                                                                                                                                                                   |                                                                                                                                                                                                                                                           |
|-----------------------------------------------------------------------------------------------------------------------------------------------------------------------------------------------------------------------------------------------------------------------------------------------------------------------------------------------------------------------------------------------------------------------------------------------------------------------------------------------------------------------------------|-----------------------------------------------------------------------------------------------------------------------------------------------------------------------------------------------------------------------------------------------------------|
| Cell division protein FtsH (SMU_15)<br>Putative amino acid ABC transporter, permease protein (SMU_1216c)<br>ABC transporter ATP-binding protein (SMU_906)<br>Histidine kinase (SMU_486)<br>Putative PTS system, glucose-specific IIABC (SMU_2047)<br>Putative ABC transporter, substrate-binding protein (SMU_651c)<br>Dextranase (SMU_2042)<br>Hypothetical protein (SMU_791c)<br>Conserved hypothetical protein (SMU_485)<br>Potassium transporter peripheral membrane protein (SMU_1708)<br>EamA family transporter (SMU_1560) | ABC transporter ATP-binding protein (SMU_906)<br>Putative ABC transporter, substrate-binding protein (SMU_651c)<br>Histidine kinase (SMU_486)<br>Cell division protein FtsH (SMU_15)<br>Putative amino acid ABC transporter, permease protein (SMU_1216c) |
|-----------------------------------------------------------------------------------------------------------------------------------------------------------------------------------------------------------------------------------------------------------------------------------------------------------------------------------------------------------------------------------------------------------------------------------------------------------------------------------------------------------------------------------|-----------------------------------------------------------------------------------------------------------------------------------------------------------------------------------------------------------------------------------------------------------|

884

885

**Fig. 1**

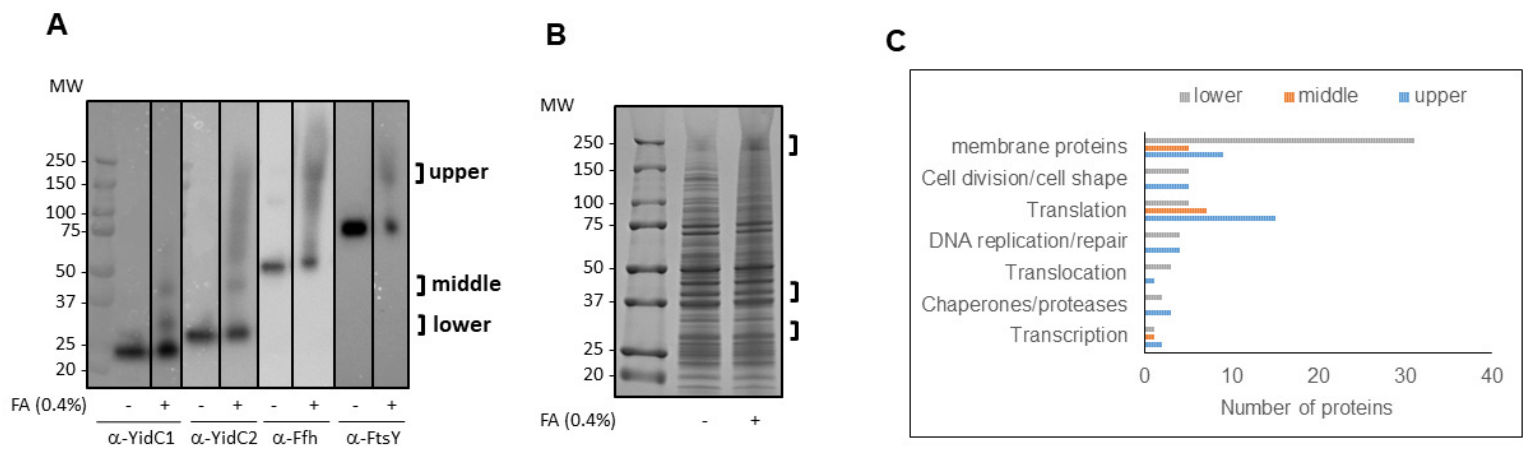

**Fig. 2**

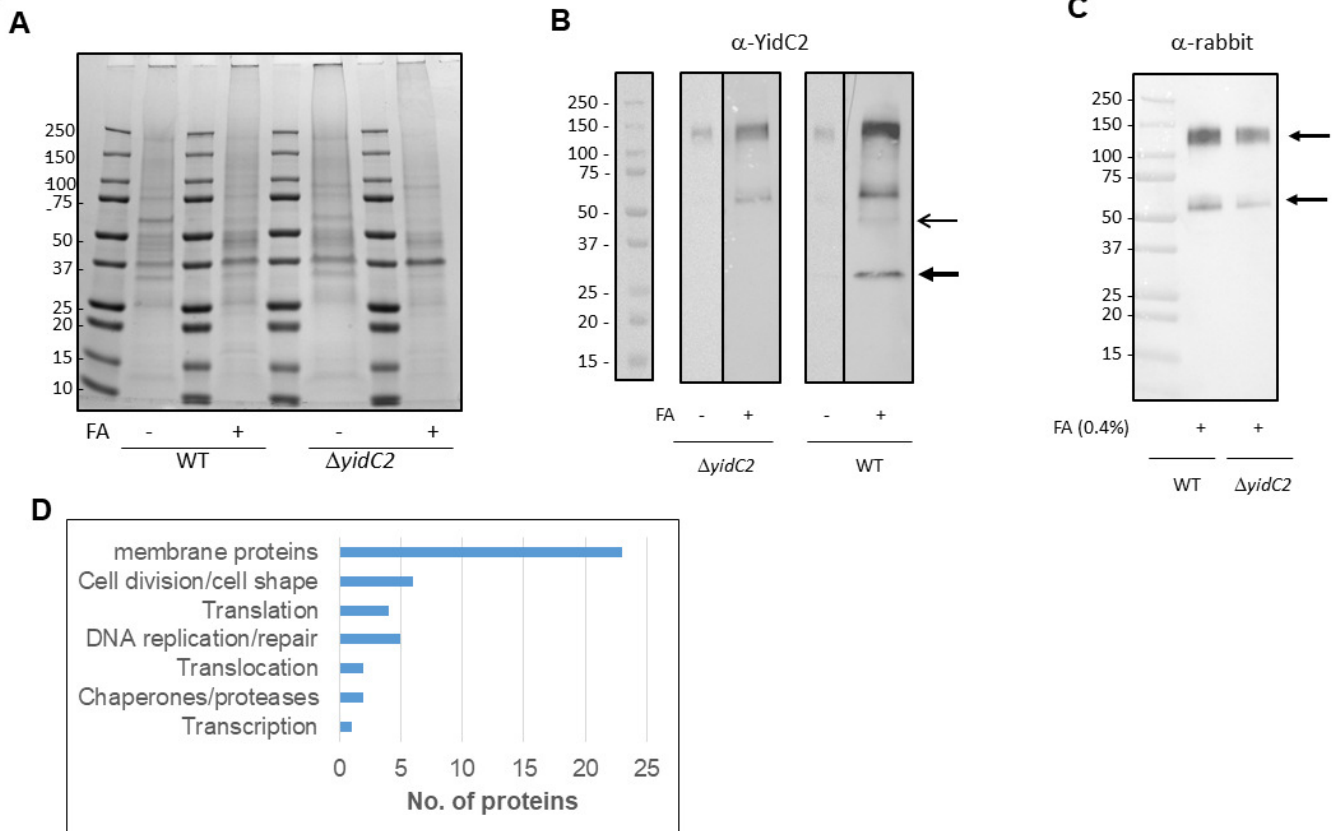

**Fig. 3**

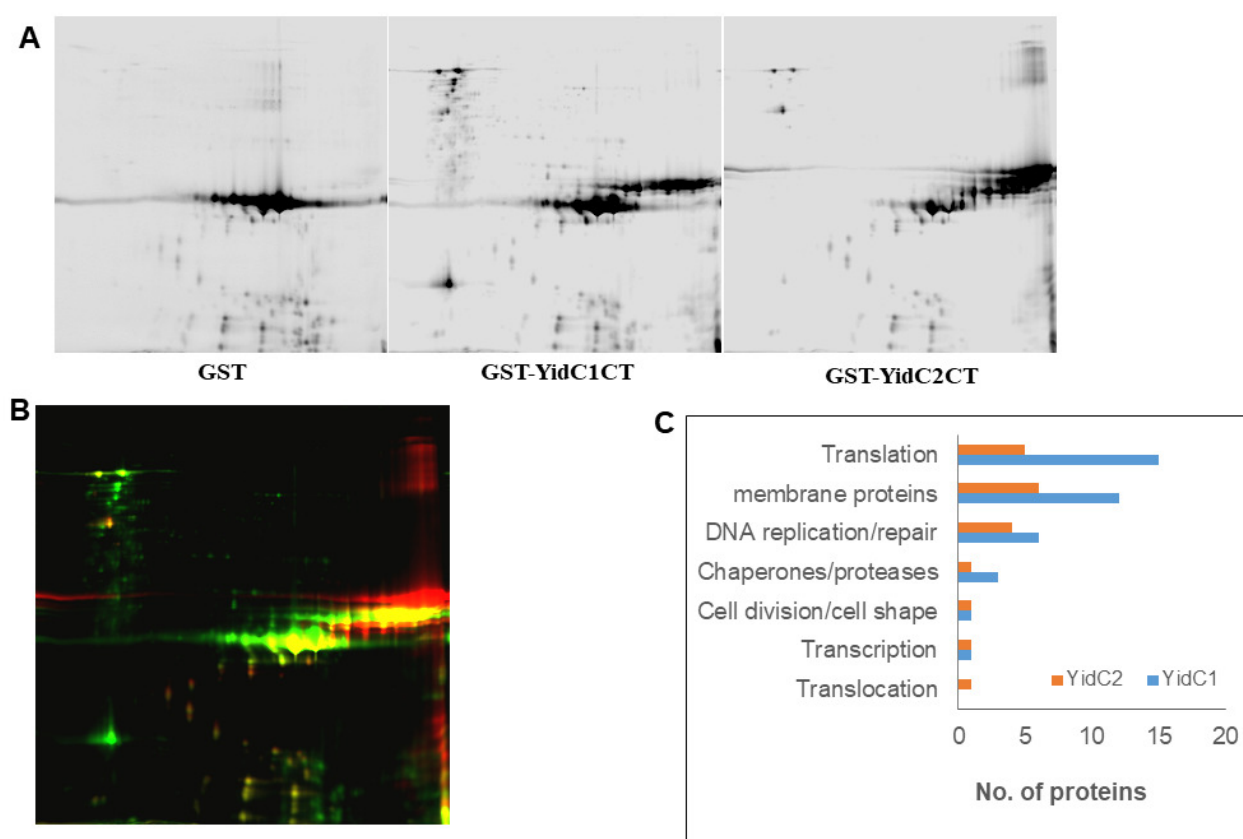

**Fig. 4**

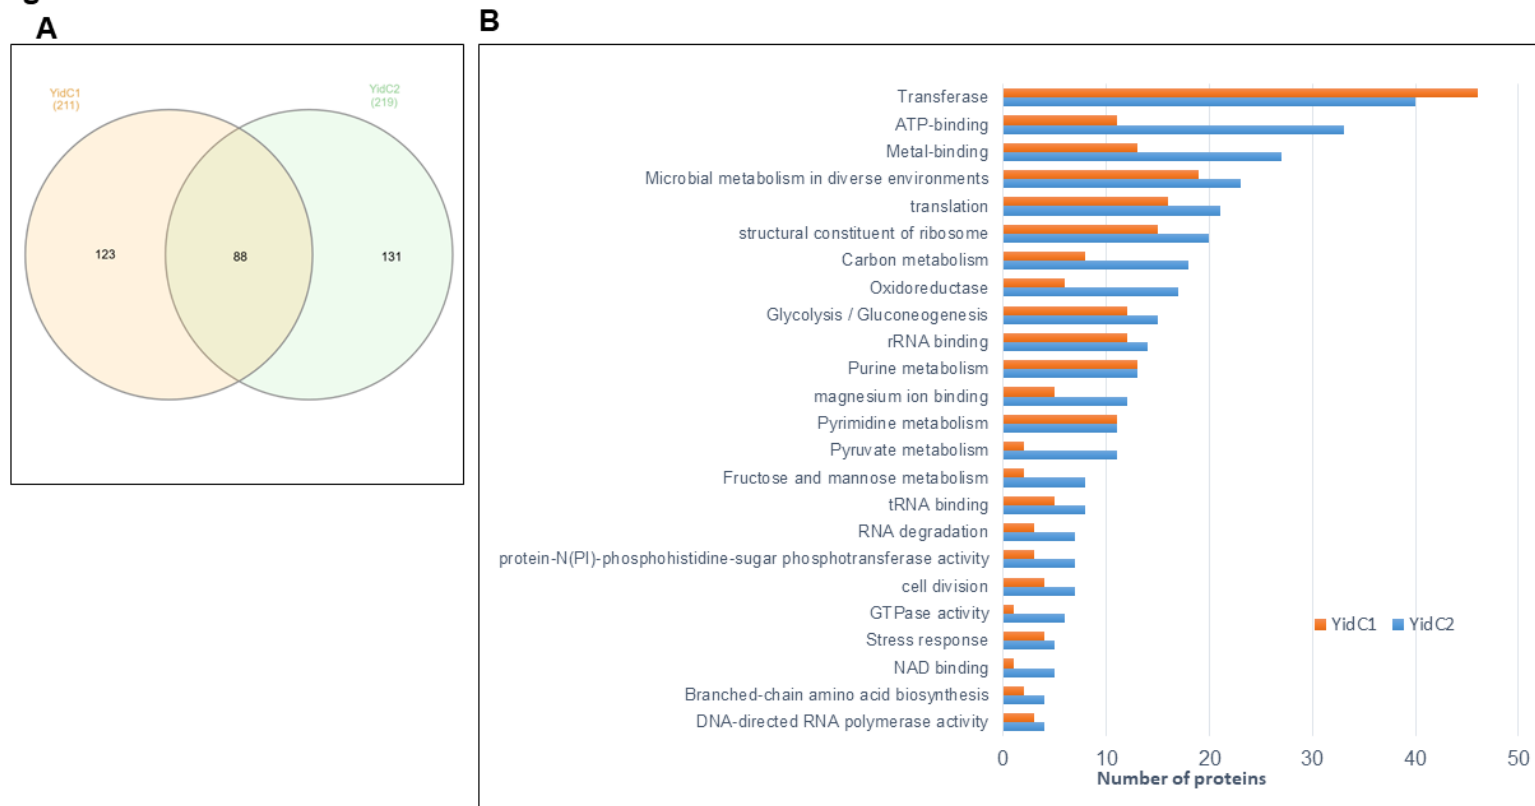



Fig. 5A

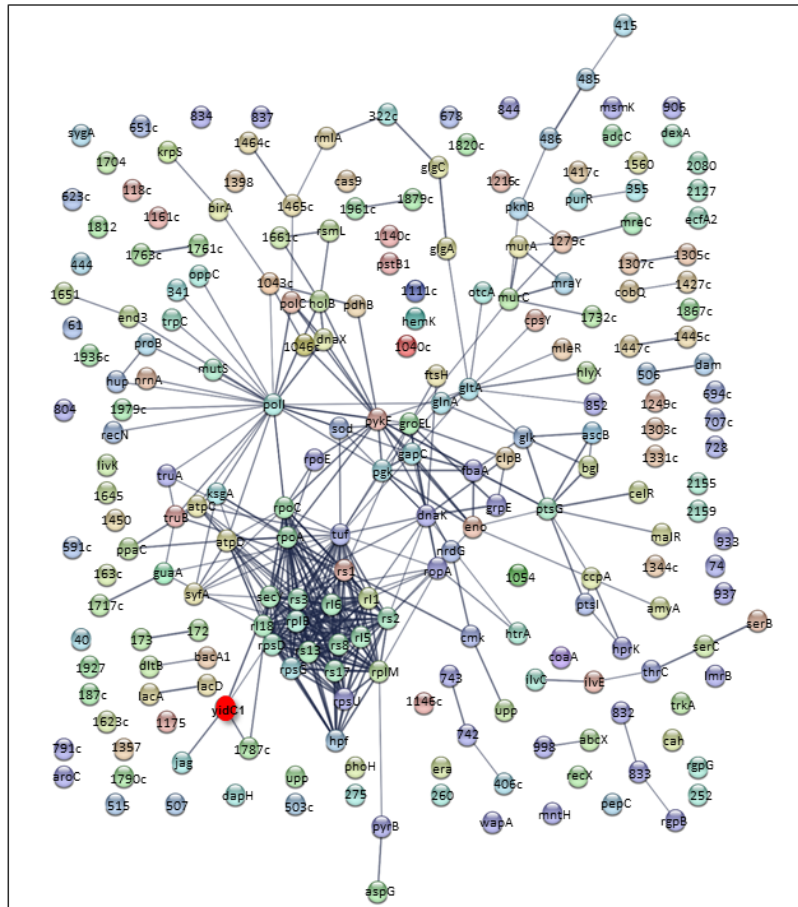



Fig. 5C

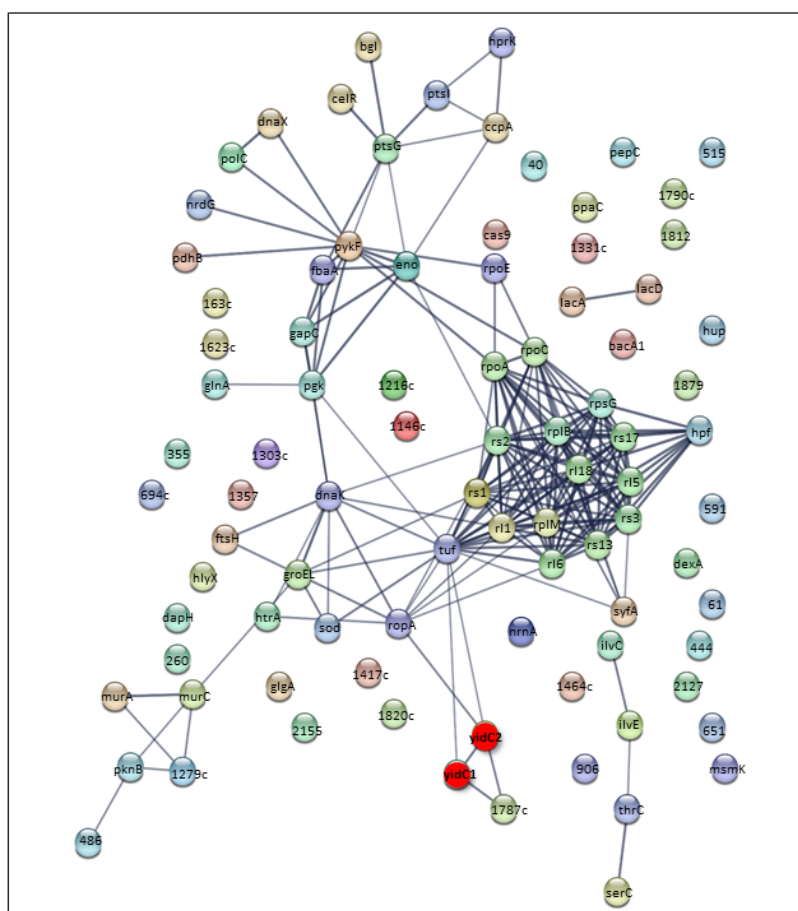

Fig. 6

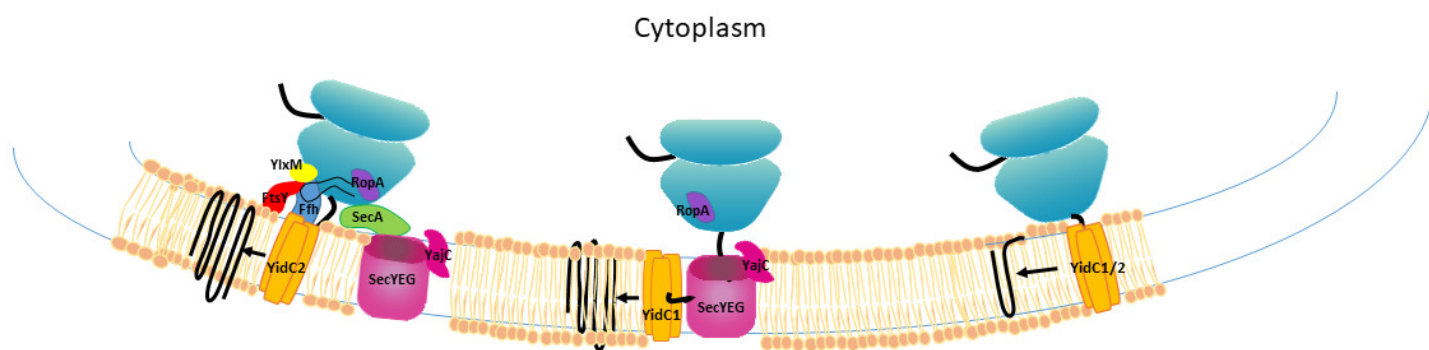

Source: https://www.biorxiv.org/content/biorxiv/early/2020/04/09/2020.04.07.031013.full.pdf
